1 **The cIAP ubiquitin ligases sustain type 3  $\gamma\delta$  T and innate lymphoid cells during**  
2 **aging to allow normal cutaneous and mucosal responses**

3 John Rizk<sup>1</sup>, Urs M. Mörbe<sup>1</sup>, Rasmus Agerholm<sup>1</sup>, Elisa Catafal Tardos<sup>1</sup>, Darshana  
4 Kadekar<sup>1</sup>, Monica Torrellas Viñals<sup>1</sup> and Vasileios Bekiaris\*<sup>1</sup>

5 <sup>1</sup>Department of Health Technology, Technical University of Denmark, Kemitorvet, Bldg  
6 202, 2800 Kgs Lyngby, Denmark.

7 \*Corresponding author: Vasileios Bekiaris [vasbek@dtu.dk](mailto:vasbek@dtu.dk)

8  
9 **Abstract**

10 Environmental and molecular cues early in life are often associated with the permanent  
11 shaping of our immune system during adulthood. Although increasing, our knowledge of  
12 the signaling pathways that operate in early life and their temporal mode of action is  
13 limited. Herein, we demonstrate that the cellular inhibitor of apoptosis proteins 1 and 2  
14 (cIAP1/2), which are E3 ubiquitin ligases and master regulators of the nuclear factor-  
15 kappa B (NF- $\kappa$ B) pathway, function during late neonatal and prepubescent life to sustain  
16 interleukin(IL)-17-producing gamma delta T cells ( $\gamma\delta$ T17) and group 3 innate lymphoid  
17 cells (ILC3). We show that cell-intrinsic deficiency in cIAP1/2 at 3-4 weeks of life leads  
18 to downregulation of the transcription factors cMAF and ROR $\gamma$ t, and failure to enter  
19 cytokine-induced cell cycle. This is followed by progressive loss of  $\gamma\delta$ T17 cells and ILC3  
20 while mice are aging. Mice deficient in cIAP1/2 have severely reduced  $\gamma\delta$ T17 cells and  
21 ILC3, present with suboptimal  $\gamma\delta$ T17 responses in the skin, lack small intestinal isolated  
22 lymphoid follicles and cannot control intestinal bacterial infection. Mechanistically, these  
23 effects appear to be dependent on overt activation of the non-canonical NF- $\kappa$ B pathway.

24 Our data identify the cIAP E3 ubiquitin ligases as critical early life molecular switches for  
25 establishing effective type-3 immunity during aging.

26

27

## 28 **Introduction**

29 The neonatal period is the time when our immune system is imprinted with life-long  
30 functional characteristics that maintain immunity to infection and prevent autoimmune  
31 pathology. Microbial colonization, and developmentally regulated transcriptional  
32 programs cooperate to shape innate and adaptive lymphocytes into distinct specialized  
33 lineages that co-exist in equilibrium and respond ad hoc (Eberl, 2016). Failure to convey  
34 these environmental and molecular cues during neonatal life, often results in irreversible  
35 dysfunction later on. Hence, early dysbiosis impairs type-3 immunity and potentiates  
36 susceptibility to type-2 driven allergy (Cahenzli *et al*, 2013) . Similarly, blockade of key  
37 signaling pathways during neonatal life can permanently change cellular niches  
38 (Kadekar *et al*, 2020). Therefore, elucidating the molecular signatures that operate early  
39 in life is of great importance for understanding how immunity develops.

40 Mouse  $\gamma\delta$  T cells present a well-established example of an immune population that  
41 is heavily dependent on an unperturbed neonatal period. In this regard, intestinal  
42 intraepithelial (IE)  $\gamma\delta$  T cells develop during neonatal and prepubescent life through  
43 butyrophylin-driven interactions with the epithelia (Di Marco Barros *et al*, 2016) . This  
44 provides a necessary defense mechanism against infection within the IEL compartment  
45 (Hoytema van Konijnenburg *et al*, 2017). Lamina propria (LP) interleukin(IL)-17-  
46 producing  $\gamma\delta$  T cells establish mixed type-3 and type-1 transcriptional programs within  
47 the first week of life through the transcription factor STAT5 (Kadekar *et al*, 2020) . Thus,

48 early life establishment of the  $\gamma\delta$ T17 compartment is critical to protect from neonatal  
49 and adult infections (Chen *et al*, 2020; Sheridan *et al*, 2013). In a similar manner,  
50 impaired microbial colonization of the ocular or oral mucosa results in drastically altered  
51 IL-17-producing  $\gamma\delta$  T ( $\gamma\delta$ T17) cell numbers in the conjunctiva (St. Leger *et al*, 2017) and  
52 cervical lymph nodes (LN) (Fleming *et al*, 2017). Again, paucity in such  $\gamma\delta$ T17 cell  
53 populations is associated with impaired anti-microbial responses in eye and oral cavity  
54 (Conti *et al*, 2014; St. Leger *et al*, 2017), and resistance to pathogenic inflammation (Cai  
55 *et al*, 2011; Sandrock *et al*, 2018; McGinley *et al*, 2020).

56 The innate lymphoid cell (ILC) compartment is also dependent on early life events,  
57 while their function during the neonatal period is critical for the establishment of the  
58 intestinal immune system (Spits *et al*, 2013). In this regard, although dysbiosis does not  
59 affect ILC development, it results in altered transcriptional and epigenetic profiles of all  
60 ILC subsets (Gury-BenAri *et al*, 2016). Similar to LP  $\gamma\delta$ T17 cells, group 3 ILC (ILC3)  
61 acquire expression of the transcription factor Tbet and the type-1 cytokine interferon- $\gamma$   
62 (IFN- $\gamma$ ) during neonatal life, which allows them to clear intracellular bacterial infections  
63 (Klose *et al*, 2013) . Moreover, group 2 ILC (ILC2) undergo an IL-33-dependent  
64 maturation step in the neonatal lung, allowing their cytokine responsiveness in adult  
65 mice (Steer *et al*, 2020). Importantly, ILC3 induce the maturation of intestinal  
66 cryptopatches into isolated lymphoid follicles (ILFs) during the first 3-4 weeks of life  
67 (Kiss *et al*, 2011; Kruglov *et al*, 2013). Evidently, perturbations of  $\gamma\delta$ T17 and ILC3  
68 development during the early stages of life will have a substantial impact on the quality  
69 of immunity while aging. The molecular pathways that control the transition of these  
70 cells from neonatal life to adolescence and adulthood are poorly understood.

71           The E3 ubiquitin ligases cellular inhibitor of apoptosis protein (cIAP)1 and 2  
72 (cIAP1/2) catalyze both degradative lysine(K)-48 and stabilizing K-63 ubiquitination and  
73 act as the main molecular switches for the activation of the canonical and non-canonical  
74 nuclear factor-kappa B (NF- $\kappa$ B) pathway (Silke & Meier, 2013) . The presence of  
75 cIAP1/2 downstream of TNF receptor 1 (TNFR1) determines whether a cell will initiate  
76 the canonical NF- $\kappa$ B pathway or die by apoptosis or necroptosis in response to TNF  
77 (Annibaldi & Meier, 2018). They achieve this by ubiquitinating receptor interacting  
78 kinase-1 (RIPK1) (Silke & Meier, 2013) . However, cIAP1/2 are mostly recognized as  
79 negative regulators of the non-canonical NF- $\kappa$ B pathway. Hence, in all cell types  
80 cIAP1/2 associate in a heterocomplex with TNF receptor associated factor (TRAF)2,  
81 TRAF3 and NF- $\kappa$ B-inducing kinase (NIK), whereby they induce K-48 ubiquitination of  
82 NIK, resulting in its continuous proteasomal degradation (Zarnegar *et al*, 2008;  
83 Varfolomeev *et al*, 2007; Vince *et al*, 2007). Breakdown of the TRAF2-TRAF3-cIAP1/2-  
84 NIK complex either following ligation of TNF superfamily receptors that recruit TRAF2-  
85 TRAF3 in their intracellular domain (e.g. TNFR2, LT $\beta$ R, CD40) or by cIAP1/2 depletion,  
86 liberates NIK, which initiates the cascade necessary for nuclear translocation of the  
87 non-canonical NF- $\kappa$ B transcription factors RelB and p52 (Vallabhapurapu *et al*, 2008;  
88 Matsuzawa *et al*, 2008)

89           In the present study we demonstrate a necessary role for cIAP1/2 in sustaining  
90  $\gamma\delta$ T17 cells and ILC3 at the late neonatal and prepubescent stages of life, and thus  
91 impacting the magnitude of inflammatory and anti-bacterial immune responses.  
92 Deficiency in cIAP1/2 begun to have an impact only during late neonatal life by reducing  
93 expression of the lineage defining transcription factors cMAF and ROR $\gamma$ t, which was  
94 followed by an apparent block in cytokine-induced proliferation. When animals entered

95 prepubescence and early adolescence, cIAP1/2 deficiency resulted in progressive loss  
96  $\gamma\delta$ T17 cells. This was independent of TNFR1 induced canonical NF- $\kappa$ B or cell death. In  
97 contrast, cIAP1/2-deficient prepubescent  $\gamma\delta$ T17 cells displayed enhanced nuclear  
98 translocation of RelB, which demonstrates evidence of overt activation of the non-  
99 canonical NF- $\kappa$ B pathway. Intestinal ILC3 also relied on intact cIAP1/2 during the same  
100 time period, with their numbers being drastically reduced in adulthood. Paucity in ILC3  
101 coincided with ILF involution. Mice with targeted deletion of cIAP1/2 in  $\gamma\delta$ T17 cells and  
102 ILC3 responded sub-optimally to cutaneous inflammatory challenge and failed to control  
103 intestinal bacterial infection.

104

## 105 **Results**

### 106 **Paucity of $\gamma\delta$ T17 cells in the absence of the E3 ubiquitin ligases cIAP1 and cIAP2**

107 Using acute, SMAC mimetic (SM) driven antagonization and in vitro techniques, we  
108 showed before that cIAP1/2 are important for T<sub>H</sub>17 differentiation through modulation of  
109 the non-canonical NF- $\kappa$ B pathway (Rizk *et al*, 2019). In order to understand the in vivo  
110 importance of cIAP1 and cIAP2 in ROR $\gamma$ t-expressing immune cells, we crossed *Rorc*-  
111 Cre (ROR $\gamma$ t<sup>CRE</sup>) mice (Eberl & Litman, 2004) with mice that were floxed for *Birc2*  
112 (cIAP1<sup>F/F</sup>) and knocked out for *Birc3* (cIAP2<sup>-/-</sup>) (Gardam *et al*, 2011). This generated  
113 mice with ROR $\gamma$ t-driven deletion of cIAP1 (referred to thereafter as  $\Delta$ IAP1) and  
114 generalized deletion of cIAP2 (referred to thereafter as  $\Delta$ IAP2), as well as the  
115 corresponding Cre-negative littermate controls (wild-type; WT) (Fig 1A).  $\Delta$ IAP1 and  
116  $\Delta$ IAP1/2 mice were viable, produced offspring at expected rates, and did not develop  
117 any observable spontaneous disease phenotypes. They contained a full set of lymph  
118 nodes (inguinal, brachial, axillary and mesenteric) and Peyer's patches indicating

119 unperturbed lymphoid tissue development, while total numbers of CD4<sup>+</sup> T and B cells  
120 were normal but  $\gamma\delta$  T were slightly elevated (Fig S1A).

121 We next analyzed some of the major IL-17-producing populations in lymph node  
122 (LN) and small intestinal and colonic lamina propria (siLP; cLP). Compared to littermate  
123 controls,  $\Delta$ IAP1/2 mice produced slightly elevated levels of IL-17A within the  
124 CD4<sup>+</sup>TCR $\beta$ <sup>+</sup> compartment in the LN (pool of inguinal, brachial, axillary) but not the gut  
125 (Fig S1B), suggesting that in these animals, steady-state production of IL-17A by CD4<sup>+</sup>  
126 T cells is not defective. Staining for IL-22 following overnight stimulation with IL-23  
127 yielded the same answer (Fig S1C). However, there was a marked reduction in  $\gamma\delta$ -  
128 associated IL-17A and IL-22 production in LN (Fig 1B) and IL-17A in the gut (Fig 1C).  
129 This was accompanied by a dramatic loss in LN TCR $\gamma\delta$ <sup>+</sup>CD27<sup>-</sup>CD44<sup>hi</sup>CCR6<sup>+</sup> (Ribot *et al*,  
130 *et al*, 2009; Haas *et al*, 2009) (Fig 1D and Fig S1D) and gut Tbet<sup>+</sup>ROR $\gamma$ t<sup>+</sup> (Kadekar *et al*,  
131 2020) (Fig 1E)  $\gamma\delta$ T17 cell numbers. Although cIAP1 and cIAP2 individually did not  
132 contribute to this phenotype in the LN,  $\Delta$ IAP2 mice had significantly reduced  
133 Tbet<sup>+</sup>ROR $\gamma$ t<sup>+</sup>  $\gamma\delta$  T cell numbers in the gut (Fig 1E). Similar to  $\gamma\delta$ T17 cells, there were  
134 significantly reduced non-CD4 IL-17-producing lymphocytes in the LNs of  $\Delta$ IAP1/2 mice  
135 (Fig S1E).

136 In the skin, CD3<sup>lo</sup>V $\gamma$ 5<sup>-</sup>TCR $\gamma\delta$ <sup>+</sup>CCR6<sup>+</sup> cells, which represent the  $\gamma\delta$ T17 population  
137 (Haas *et al*, 2009, 2012), were also reduced significantly in the absence of cIAP1 and  
138 cIAP2 (Fig 2A). When we analyzed the two major  $\gamma\delta$ T17 subpopulations (V $\gamma$ 4<sup>+</sup> versus  
139 V $\gamma$ 4<sup>-</sup>; V $\gamma$  nomenclature by Heilig and Tonegawa; (Heilig & Tonegawa, 1986)), we found  
140 that in the skin cIAP1 but not cIAP2 was required for V $\gamma$ 4<sup>-</sup> cells, whereas the V $\gamma$ 4<sup>-</sup>  
141 expressing population was only affected by the absence of both cIAP1 and cIAP2 (Fig  
142 2B). In the LN, we did not observe differential regulation of either V $\gamma$ 4<sup>+</sup> or V $\gamma$ 4<sup>-</sup> cells (Fig

143 S2A). Collectively, this data suggests that cIAP1/2 are important for the development  
144 and/or homeostatic maintenance of  $\gamma\delta$ T17 cells. Our findings additionally pinpoint a  
145 differential and non-redundant role of cIAP1 and cIAP2 in these cells that is organ and  
146 subset specific. In this regard, whereas skin  $\gamma\delta$ T17 cells depended more on cIAP1, gut  
147  $\gamma\delta$ T17 cells depended more on cIAP2.

148

### 149 **Cell-intrinsic requirement for cIAP1 and cIAP2 in $\gamma\delta$ T17 cells**

150 Next, we investigated whether the defect we observed in  $\Delta$ IAP1/2 mice was cell-  
151 intrinsic. To this end we set up mixed bone marrow (BM) chimeras where WT  
152 CD45.1<sup>+</sup>CD45.2<sup>+</sup> hosts were sub-lethally irradiated and reconstituted with a mixture of  
153 1:1 CD45.1<sup>+</sup> WT and CD45.2<sup>+</sup>  $\Delta$ IAP1/2 BM cells (Fig 3A). We found that, under these  
154 conditions, WT LN  $\gamma\delta$ T17 cells outcompeted their  $\Delta$ IAP1/2 counterparts (Fig 3B),  
155 indicating the phenotype we observed in intact mice was cell intrinsic. Interestingly,  
156 CD27<sup>+</sup>  $\gamma\delta$  T cells derived from  $\Delta$ IAP1/2 BM were slightly less competitive than WT (Fig  
157 3B). In contrast, both CD3<sup>-</sup> populations and B cells from  $\Delta$ IAP1/2 BM were more  
158 competitive than their WT counterparts (Fig 3C). This indicated that the reduced  
159 competitiveness of  $\gamma\delta$ T17 and CD27<sup>+</sup>  $\gamma\delta$  T cells was not due to defective  $\Delta$ IAP1/2 BM  
160 reconstitution. We could not reconstitute gut ROR $\gamma$ t<sup>+</sup>Tbet<sup>+</sup>  $\gamma\delta$ T17 cells irrespective of  
161 the BM source (Fig 3D), suggesting that this population requires either thymus-  
162 originated  $\gamma\delta$  T cells or a neonatal microenvironment to develop fully. In contrast, lack of  
163 cIAP1 and cIAP2 did not impinge on the reconstitution of gut Tbet<sup>+</sup>ROR $\gamma$ t<sup>-</sup>  $\gamma\delta$  T cells  
164 (Fig 3E). Likewise, we could only recover WT LN  $\gamma\delta$ T17 cells when we reconstituted  
165  $\Delta$ IAP1/2 hosts with WT or a 1:1 mix of WT and  $\Delta$ IAP1/2 BM (Fig S3A-B), while CD27<sup>+</sup>

166  $\gamma\delta$  T cells from WT or  $\Delta$ IAP1/2 BM cells were equally competitive (Fig S3B). As before,  
167 we could not reconstitute ROR $\gamma$ t<sup>+</sup>Tbet<sup>+</sup>  $\gamma\delta$ T17 cells in the gut (Fig S3C).

168 As  $\gamma\delta$ T17 cells develop perinatally in the thymus and undergo a rapid neonatal re-  
169 programming within the tissues they localize at, we reasoned that if generated from BM  
170 stem cells, they might have different developmental or homeostatic requirements for  
171 cIAP1 and cIAP2. To address this issue, we purified  $\gamma\delta$  T cells from the thymi of 1-day  
172 old WT or  $\Delta$ IAP1/2 mice and transferred them to RAG1<sup>-/-</sup> recipients (Fig 3F). We found  
173 that 12 weeks post transfer, the  $\gamma\delta$ T17 cell compartment was reconstituted in the LN,  
174 however, we recovered significantly more WT than  $\Delta$ IAP1/2 cells (Fig 3G). As with the  
175 BM chimeras, we could not reconstitute intestinal ROR $\gamma$ t<sup>+</sup>Tbet<sup>+</sup>  $\gamma\delta$ T17 cells, suggesting  
176 that this population requires a neonatal microenvironment (Fig S3D). Reconstitution of  
177 CD27<sup>+</sup>  $\gamma\delta$  T cells was independent of cIAP1 and cIAP2 (Fig 3G). Taken together our  
178 data show that  $\gamma\delta$ T17 cells require cIAP1 and cIAP2 intrinsically.

179

### 180 **The impact of cIAP1 and cIAP2 on $\gamma\delta$ T17 cells is independent of TNF induced** 181 **canonical NF- $\kappa$ B and cell death**

182 In addition to preventing spontaneous activation of the non-canonical NF- $\kappa$ B pathway,  
183 cIAP1/2 are necessary to convey the canonical NF- $\kappa$ B downstream of TNFR1 whereas  
184 in their absence, TNF-TNFR1 interactions can lead to RIPK1-mediated cell death via  
185 apoptosis or necroptosis (Annibaldi & Meier, 2018). Mice deficient in TNFR1 had an  
186 intact  $\gamma\delta$ T17 cell population (Fig S4A), suggesting that the canonical NF- $\kappa$ B pathway  
187 downstream of TNFR1 is not responsible for the phenotype of  $\Delta$ IAP1/2 mice. Since TNF  
188 is highly upregulated during the weaning reaction (Al Nabhani *et al*, 2019), we next  
189 investigated whether TNF induced cell death played a role. To achieve this, we initially



190 analyzed mice that were deficient in cIAP2 and expressed a ubiquitin-associated (UBA)  
191 domain mutant form of cIAP1 unable to K48 ubiquitylate and suppress RIPK1 (Annibaldi  
192 *et al*, 2018). Thus, these mice are more sensitive to TNF induced cell death (Annibaldi  
193 *et al*, 2018). In UBA-mutant mice,  $\gamma\delta$ T17 cells were not affected (Fig S4B), suggesting  
194 that these cells are not susceptible to death by homeostatic levels of TNF. In order to  
195 test this directly in  $\Delta$ IAP1/2 mice, we began injecting 1-week old neonates with  
196 neutralizing anti-TNF antibody and until animals were 12-week old (Fig S4C). We could  
197 not rescue the  $\gamma\delta$ T17 population in either gut or LNs (Fig S4D-E), indicating that TNF  
198 induced death is unlikely to play a major role in regulating these cells in the absence of  
199 cIAP1/2. Therefore, TNF-TNFR1 interactions are not responsible for the  $\Delta$ IAP1/2  
200 phenotype, suggesting that overt activation of the non-canonical NF- $\kappa$ B pathway could  
201 play a key role.

202

### 203 **cIAP1 and cIAP2 are required for $\gamma\delta$ T17 cell cycle progression and expression of** 204 **cMAF and ROR $\gamma$ t during aging**

205 In order to assess the impact of cIAP1/2 on embryonic  $\gamma\delta$ T17 cell development, we  
206 enumerated thymic cell numbers in newborn  $\Delta$ IAP1/2 mice and found them similar to  
207 littermate controls (Fig 4A). Production of IL-17A/F were unchanged at this stage (Fig  
208 S5A). This suggested that the major impact of cIAP1/2 occurs post-embryonically. We  
209 therefore tracked LN  $\gamma\delta$ T17 cells, defined phenotypically as CD27-CD44<sup>hi</sup>, during  
210 neonatal, post-neonatal (average weaning time at 3 weeks) and adult life (mating age of  
211 8 weeks). We did not find any differences in cell numbers until week 5 of age (Fig 4B).  
212 This suggested that cIAP1 and cIAP2 are only required to sustain  $\gamma\delta$ T17 numbers  
213 following weaning. After week 5,  $\Delta$ IAP1/2  $\gamma\delta$ T17 cells failed to expand and began to

214 decline progressively during aging (Fig 4B). In order to confirm that the cells are missing  
215 from adult life and have not converted to a non- $\gamma\delta$ T17 population, we crossed  $\Delta$ IAP1/2  
216 with the ROSA26-LSL-RFP strain, so that RFP permanently marks all current and “ex”  
217 ROR $\gamma$ t-expressing cells. We found no evidence of  $\gamma\delta$ T17 conversion to other  
218 populations (Fig 4C). This data suggested that cIAP1/2 regulate a checkpoint in early  
219 adult life that manifests during aging.

220 We next investigated what this checkpoint was. The inability of the cells to increase  
221 in numbers during aging, raised the hypothesis that cIAP1/2 may be regulating  
222 responsiveness to cytokines that induce proliferation. We thus isolated 4-week old LN  
223 cells and treated them in vitro with IL-7 or a combination of IL-1 $\beta$ +IL-23. We found that  
224  $\Delta$ IAP1/2  $\gamma\delta$ T17 cells were slower in entering cell cycle with most cells stuck in G0 (Fig  
225 4D-E). Therefore, cIAP1/2 are important for  $\gamma\delta$ T17 cell cycle progression.

226 We have shown before that ablation of cIAP1/2 in T cells downregulates cMAF, a  
227 lineage determining transcription factor for  $\gamma\delta$ T17 cells (Zuberbuehler *et al*, 2019), in a  
228 NIK- and RelB-dependent mechanism (Rizk *et al*, 2019). We thus hypothesized that  
229 lack of cIAP1/2 may influence expression of cMAF. In newborn thymus expression of  
230 cMAF as well as ROR $\gamma$ t was unchanged (Fig S5B). At week 1 after birth we observed a  
231 slight reduction in the expression of ROR $\gamma$ t and cMAF (Fig S5C). However, at week 3 of  
232 age, expression of ROR $\gamma$ t and cMAF was significantly reduced (Fig 5A). Furthermore,  
233 we observed a modest but significant reduction in IL-17A production by 3-week old  
234  $\Delta$ IAP1/2  $\gamma\delta$ T17 cells (Fig 5B). In the intestine, ROR $\gamma$ t<sup>+</sup>  $\gamma\delta$  T cells express high levels of  
235 CD127 (IL-7R $\alpha$ ) and intermediate levels of CD45 (Fig 5C). Due to lack of other reliable  
236 surface markers to identify these cells in the gut, we gated TCR $\gamma\delta$ <sup>+</sup>CD45<sup>int</sup>CD127<sup>+</sup> cells  
237 and quantified numbers as well as expression of ROR $\gamma$ t and cMAF. Similar to the LNs,

238 numbers in the siLP did not change in 4-week old  $\Delta$ IAP1/2 mice (Fig 5D), however there  
239 was a significant reduction in the levels of ROR $\gamma$ t and cMAF (Fig 5E). At the same time  
240 there were higher levels of nuclear RelB in  $\Delta$ IAP1/2  $\gamma\delta$ T17 cells compared to control  
241 cells, arguing for a role of the non-canonical NF- $\kappa$ B pathway in this process (Fig 5F).  
242 Therefore, cIAP1/2 are required during late neonatal life in order to maintain expression  
243 of the transcription factors ROR $\gamma$ t and cMAF and to sustain normal  $\gamma\delta$ T17 numbers.

244

### 245 **Inflammation partially restores $\gamma\delta$ T17 responses in the absence of cIAP1 and** 246 **cIAP2**

247 Next, we investigated whether cytokines that activate  $\gamma\delta$ T17 cells could regulate  
248 expression of ROR $\gamma$ t and cMAF from 4-week old mice. Culture with IL-7 did not  
249 influence expression of either transcription factors (Fig 6A-C), however, a combination  
250 of IL-1 $\beta$  and IL-23 resulted in partial restoration of ROR $\gamma$ t but not cMAF in  $\Delta$ IAP1/2  
251  $\gamma\delta$ T17 cells (Fig 6A-C). Interestingly, IL-1 $\beta$ +IL-23 resulted in downregulation of cMAF in  
252 WT cells (Fig 6A-B). We additionally observed that the  $\Delta$ IAP1/2  $\gamma\delta$ T17 cells that  
253 acquired ROR $\gamma$ t, were the cells that entered G1 in response to IL-1 $\beta$ +IL-23 and to a  
254 lesser extent in response to IL-7 (Fig S6A). In the imiquimod(IMQ)-driven psoriasiform  
255 dermatitis model, IL-23, IL-1 $\beta$  and IL-7 drive  $\gamma\delta$ T17 cell expansion as well as production  
256 of IL-17 and IL-22 in the LN and skin (Michel *et al*, 2012; Cai *et al*, 2011, 2014). We thus  
257 treated WT,  $\Delta$ IAP1,  $\Delta$ IAP2, and  $\Delta$ IAP1/2 4-week old mice with IMQ for seven days and  
258 assessed expression of ROR $\gamma$ t and cMAF in  $\gamma\delta$ T17 cells. We found that IMQ treatment  
259 partially restored expression of both ROR $\gamma$ t and cMAF in  $\Delta$ IAP1/2  $\gamma\delta$ T17 cells in the  
260 LNs (Fig 6D), suggesting that inflammation can rescue the  $\Delta$ IAP1/2 phenotype.

261 We then investigated whether rescue of ROR $\gamma$ t and cMAF was sufficient for  
262  $\Delta$ IAP1/2  $\gamma\delta$ T17 cells to mount an immune response. We observed that despite an  
263 increase in Ki67 expression (Fig S7A),  $\Delta$ IAP1/2  $\gamma\delta$ T17 numbers did not increase in  
264 either the LNs or skin (Fig 6E). Evaluation of cytokine production revealed substantial  
265 regional differences between LN and skin in  $\Delta$ IAP1/2 mice. Thus, whereas in the LN,  
266  $\Delta$ IAP1/2  $\gamma\delta$ T17 cells increased (albeit significantly less than their WT,  $\Delta$ IAP1 and  $\Delta$ IAP2  
267 counterparts) their production of IL-17A following IMQ treatment, this was not the case  
268 in the skin (Fig 6F). In contrast, IL-22 production in LNs was significantly reduced while  
269 it was relatively normal in the skin (Fig 6G). The CD4<sup>+</sup> T cell response to IMQ was not  
270 defective and slightly stronger in  $\Delta$ IAP1/2 mice (Fig S7B). The extent of skin  
271 inflammation, as measured by epidermal thickening, was not different between  $\Delta$ IAP1/2  
272 and control mice, reflecting both the partial rescue of the  $\gamma\delta$ T17 as well as the slightly  
273 exaggerated CD4<sup>+</sup> T cell response (Fig S7C).

274 The data suggest that although at a young age cIAP1/2 regulate proliferation,  
275 transcriptional stability and cytokine production, strong inflammatory stimuli can, to a  
276 certain extent, overcome this regulatory checkpoint and revive  $\gamma\delta$ T17 cell responses.  
277 These results additionally indicate that the extrathymic expression and biological impact  
278 thereafter of ROR $\gamma$ t and cMAF can be dynamic and under the control of multiple  
279 microenvironment cues.

280

## 281 **cIAP1 and cIAP2 are required for intestinal ILC3 during aging and for sustaining** 282 **ILF integrity**

283 ILC3 share many functional characteristics and transcription factor requirements with  
284  $\gamma\delta$ T17 cells, including constitutive expression of ROR $\gamma$ t and cMAF (Zuberbuehler *et al*,

285 2019; Parker *et al*, 2019). We therefore investigated the impact of cIAP1 and cIAP2  
286 deficiency in intestinal ILC3 populations. Similar to  $\gamma\delta$ T17 cells, LP Tbet<sup>+</sup> and Tbet<sup>-</sup> ILC3  
287 numbers were reduced in  $\Delta$ IAP1/2 mice (Fig 7A-C and Fig S8A). As expected ILC2  
288 numbers were not affected (Fig S8B). Similar to  $\gamma\delta$ T17 cells, we found that ILC3  
289 numbers did not expand post weaning (Fig 7D). Next, we investigated whether the ILC3  
290 defect in  $\Delta$ IAP1/2 mice was cell-intrinsic. To this end, using mixed BM chimeras, we  
291 found that WT ILC3 outcompeted their  $\Delta$ IAP1/2 counterparts (Fig 7E-F), indicating that  
292 the phenotype we observed in intact mice was cell-intrinsic. There was equal  
293 reconstitution capacity of GATA3-expressing ILC2 derived from WT or  $\Delta$ IAP1/2 BM (Fig  
294 S8C), demonstrating the specificity of the defect within ROR $\gamma$ t-expressing populations.  
295 We obtained similar results when we reconstituted  $\Delta$ IAP1/2 hosts with a 1:1 mix of WT  
296 and  $\Delta$ IAP1/2 BM (Fig 7G and Fig S8D). Further, cIAP1 and 2 deficient ILC3 cells were  
297 not rescued by treatment with anti-TNF (Fig. S8E)

298 ILC3 are necessary for the maturation of cryptopathces to ILFs during the first  
299 weeks of life.  $\Delta$ IAP1/2 mice had severely defective ILFs (Fig 7H). ILFs in these mice  
300 were either absent or reduced in size (Fig 7H). Despite the lack of ILFs, production of  
301 IgA was not defective (Fig S8F). Collectively, this data shows that cIAP1 and cIAP2 are  
302 necessary for intestinal ILC3 to expand during the post-weaning period, and to induce  
303 formation of ILFs.

304

### 305 **cIAP1 and cIAP2 are necessary to protect against *Citrobacter rodentium* infection**

306 It has been demonstrated that ILC3 are important to control infection by the attaching  
307 and effacing bacterium *Citrobacter rodentium* (Bauché *et al*, 2020; Guo *et al*, 2015,  
308 2014), a widely used model for human enteropathogenic *E. coli* infections (Silberger *et*

309 *al*, 2017) .We therefore reasoned that  $\Delta$ IAP1/2 mice may be defective in mounting a  
310 protective response to *C. rodentium*. We infected  $\Delta$ IAP1/2 mice and their respective  
311 controls with  $2 \times 10^9$  CFU of *C. rodentium* through oral gavage and followed weight loss  
312 as a surrogate marker for disease. We found that by 11 days after infection  $\Delta$ IAP1/2  
313 mice lost approximately 20% of their body weight, while all other strains did not (Fig 8A).  
314 At this time point and due to ethical constraints, all animals were sacrificed and we  
315 analyzed bacterial loads and the immune response in the colon.  $\Delta$ IAP1/2 mice had  
316 significantly higher colonic bacterial load than controls (Fig 8B). This was associated  
317 with compromised IL-22 production from the ILC3 compartment (Fig 8C-D).

318 Although ILC3 are important to protect from *C. rodentium* infection, a  $T_H17$  and  
319  $T_H22$  response is also required, as evidenced by susceptibility of  $RAG1^{-/-}$  mice to this  
320 pathogen(Silberger *et al*, 2017). We therefore additionally analyzed the  $CD4^+$  T cell  
321 response in the colon. Numbers of total  $CD4^+$  T cells were not changed in infected  
322  $\Delta$ IAP1/2 mice (Fig 8E). However, there was a significant reduction in  $ROR\gamma^+Tbet^- CD4^+$   
323 T cells (Fig 8E), which was accompanied by reduced levels of IL-17A (Fig 8F). Despite  
324 normal numbers of  $ROR\gamma^+Tbet^+ CD4^+$  T cells (Fig 8E), IL-17A<sup>+</sup>IFN- $\gamma^+$  cells were  
325 significantly reduced in infected  $\Delta$ IAP1/2 mice (Fig 8F). However, production of IL-22  
326 was not defective in the absence of cIAP1 and cIAP2 (Fig 8F). Collectively, our data  
327 suggest that cIAP1 and cIAP2 are required within the ILC3 and  $T_H17$  compartments to  
328 control intestinal bacterial infection.

329

## 330 **Discussion**

331 In the present study we demonstrate that the E3 ubiquitin ligases cIAP1 and cIAP2 are  
332 necessary for  $\gamma\delta T17$  cells to transition through to prepubescent life by regulating

333 cytokine-mediated proliferation and stable expression of the lineage defining  
334 transcription factors cMAF and ROR $\gamma$ t. Thus, during aging, cIAP1 and cIAP2 are  
335 required in a cell-intrinsic manner to maintain cMAF and ROR $\gamma$ t levels and to allow cells  
336 to enter cell cycle in response to IL-7, IL-1 $\beta$  and IL-23. Consequently,  $\gamma\delta$ T17-driven  
337 inflammatory responses in the skin and draining LNs of prepubescent  $\Delta$ IAP1/2 mice are  
338 blunted despite normal cell numbers, while by the time animals reach adulthood,  $\gamma\delta$ T17  
339 populations are deficient in gut, skin and LNs. Mechanistically, our data suggest that  
340 this is independent of TNF and TNFR1 and most likely through overt activation of the  
341 non-canonical NF- $\kappa$ B pathway. Similar to  $\gamma\delta$ T17, ILC3 required cIAP1 and cIAP2  
342 expression during the post-weaning period in order to expand, be maintained until adult  
343 life, and induce formation of intestinal ILFs. The ILC3 deficit in  $\Delta$ IAP1/2 mice together  
344 with a defective T<sub>H</sub>17 response, correlated with a profound inability to control intestinal  
345 bacterial infection.

346 The IL-17-producing  $\gamma\delta$  T cell subset is an innate-like unconventional lymphocyte  
347 that is important in many immunological processes ranging from anti-microbial  
348 protection to pathogenic inflammation and cancer (Patil *et al*, 2015).  $\gamma\delta$ T17 cells are  
349 pre-programmed and functionally mature in the embryonic thymus in mouse and human  
350 (Ribot *et al*, 2009; Haas *et al*, 2012). They are exported into peripheral and secondary  
351 lymphoid tissues after birth, and evidence suggests that they go through a second wave  
352 of transcriptional and functional programming during neonatal life within the tissues they  
353 occupy (Kadekar *et al*, 2020; Wiede *et al*, 2017). The molecular cues that  $\gamma\delta$ T17 cells  
354 receive within the tissues during that period are obscure. Our data show that the E3  
355 ligases cIAP1 and cIAP2 are required during late neonatal and early prepubescent life  
356 in a cell-intrinsic manner for cytokine-induced proliferation, to sustain transcriptional

357 stability and allow optimal inflammatory responses. This work establishes cIAP1/2 as  
358 critical molecular regulators of committed tissue-resident  $\gamma\delta$ T17 cells, and underpins the  
359 existence and importance of post-thymic temporal events necessary for these cells to  
360 be maintained during aging.

361 cIAP1/2 are central for TNFR1 induced canonical NF- $\kappa$ B activation and cell death  
362 (Mahoney *et al*, 2008) , and necessary to suppress overt non-canonical NF- $\kappa$ B signaling  
363 (Vallabhapurapu *et al*, 2008; Zarnegar *et al*, 2008) . TNFR1 induced apoptosis and  
364 necroptosis are fundamental biological processes regulating cell growth during  
365 development, homeostatic turnover and even inflammatory diseases (Kalliolias &  
366 Ivashkiv, 2016). The two NF- $\kappa$ B pathways on the other hand are synonymous with cell  
367 survival, proliferation and differentiation in ubiquitous cell populations (Hayden & Ghosh,  
368 2011). In T cells they are mostly active downstream of TNF superfamily receptors and  
369 the TCR (Oh & Ghosh, 2013). Although the role of several TNF superfamily receptors  
370 and ligands have been studied in  $\gamma\delta$  T cells (Powolny-Budnicka *et al*, 2011; Shibata *et*  
371 *al*, 2011; Silva-Santos *et al*, 2005), the importance of the signaling components of the  
372 NF- $\kappa$ B pathway had not been thoroughly investigated. Genetic and pharmacological  
373 perturbations of the TNFR1 signaling, combined with aberrant nuclear translocation of  
374 RelB that it is the cIAP1/2-mediated control of non-canonical NF- $\kappa$ B that is required for  
375 the maintenance of  $\gamma\delta$ T17 cells. This agrees with CD27, a TNF superfamily receptor  
376 and potent activator of non-canonical NF- $\kappa$ B (Ramakrishnan *et al*, 2004), suppressing  
377 the  $\gamma\delta$ T17 differentiation program (Ribot *et al*, 2009). Importantly, deletion of NIK, the  
378 kinase targeted by cIAP1/2 and responsible for activating the non-canonical NF- $\kappa$ B  
379 cascade, did not affect  $\gamma\delta$ T17 cell development or homeostasis (Mair *et al*, 2015). This



380 strongly suggests that it is the “brake” imposed by cIAP1/2 in order to avoid over  
381 activation of non-canonical NF- $\kappa$ B that is critical and not its baseline activity.

382 There are a number of transcription factors that are important for the development  
383 of  $\gamma\delta$ T17 cells (Parker & Ciofani, 2020) . Ciofani and co-workers showed that cMAF acts  
384 early in embryogenesis to allow robust expression of ROR $\gamma$ t and thus promote  
385 specification and stability of the  $\gamma\delta$ T17 lineage (Zuberbuehler *et al*, 2019). How cMAF  
386 and ROR $\gamma$ t expression is regulated, however, in  $\gamma\delta$ T17 cells is not well-defined. Herein,  
387 we demonstrate that loss of cIAP1/2 results in the progressive downmodulation of cMAF  
388 and ROR $\gamma$ t after birth, providing a molecular understanding of how lineage defining  
389 transcription factors are regulated in these cells. Although loss of cMAF and ROR $\gamma$ t  
390 during embryonic development resulted in rapid loss of  $\gamma\delta$ T17 cells or their progenitors  
391 in the thymus (Zuberbuehler *et al*, 2019; Shibata *et al*, 2011) , we observed that in  
392  $\Delta$ IAP1/2 mice, cells persist for at least 2 weeks without either transcription factor. Thus,  
393 it appears that during neonatal life the impact of cMAF and ROR $\gamma$ t in  $\gamma\delta$ T17 cells is less  
394 pronounced. The exact molecular steps leading to cIAP1/2-dependent regulation of  
395 cMAF and ROR $\gamma$ t are currently unclear. Our previous work showed that following  
396 cIAP1/2 inhibition, NIK-mediated RelB nuclear translocation suppressed expression of  
397 cMAF in T<sub>H</sub>17 cells (Rizk *et al*, 2019). It is plausible therefore, that accumulation of non-  
398 canonical NF- $\kappa$ B signaling directly suppresses cMAF, which subsequently suppresses  
399 ROR $\gamma$ t. Intriguingly, cytokine stimulation and inflammation could partially restore  
400 expression of cMAF and ROR $\gamma$ t, indicating a certain degree of transcriptional plasticity.

401 In addition to  $\gamma\delta$ T17 cells, cIAP1/2 were necessary for the establishment of a  
402 normal ILC3 population during the post-weaning period in the gut and the formation of  
403 ILFs, as well as protection from intestinal extracellular bacterial infection. During

404 infection, we additionally found that cIAP1/2, were critical for the generation of IL-17<sup>+</sup>  
405 and IL-17<sup>+</sup>IFN- $\gamma$ <sup>+</sup> CD4<sup>+</sup> T cells, which have been associated with protection against  
406 pathogens, or tissue damage in the context of inflammation (Omenetti *et al*, 2019). We  
407 and others have previously reported that the cIAP-non-canonical NF- $\kappa$ B axis is  
408 necessary for T<sub>H</sub>17 differentiation and successful IL-17-driven responses (Rizk *et al*,  
409 2019; Kawalkowska *et al*, 2019), while NIK was shown to be important for the  
410 generation of neuropathogenic T<sub>H</sub>17 cells (Lacher *et al*, 2018). Moreover, NIK  
411 expression and activation of the non-canonical NF- $\kappa$ B pathway in dendritic cells  
412 indirectly regulates maintenance of both T<sub>H</sub>17 cells and ILC3 (Jie *et al*, 2018). Our  
413 current data, extend and broaden the immunological importance of this pathway. We  
414 would like to propose that through regulation of non-canonical NF- $\kappa$ B, cIAP1/2 are  
415 master regulators of innate and adaptive type-3 immunity. Their requirement is  
416 necessary during neonatal life to establish functional innate and innate-like type-3  
417 immune cell populations, whereas in the adult they support differentiation of antigen-  
418 dependent adaptive type-3 cells.

419

## 420 **References**

- 421 Annibaldi A & Meier P (2018) Checkpoints in TNF-Induced Cell Death: Implications in  
422 Inflammation and Cancer. *Trends Mol Med* 24: 49–65
- 423 Annibaldi A, Wicky John S, Vanden Berghe T, Swatek KN, Ruan J, Liccardi G, Bianchi  
424 K, Elliott PR, Choi SM, Van Coillie S, *et al* (2018) Ubiquitin-Mediated Regulation of  
425 RIPK1 Kinase Activity Independent of IKK and MK2. *Mol Cell* 69: 566-580.e5
- 426 Bauché D, Joyce-Shaikh B, Fong J, Villarino A V, Ku KS, Jain R, Lee Y-C, Annamalai L,  
427 Yearley JH & Cua DJ (2020) IL-23 and IL-2 activation of STAT5 is required for

- 428 optimal IL-22 production in ILC3s during colitis
- 429 Bouladoux N, Harrison OJ & Belkaid Y (2017) The Mouse Model of Infection with  
430 *Citrobacter rodentium*. *Curr Protoc Immunol* 119: 19.15.1-19.15.25
- 431 Cahenzli J, Köller Y, Wyss M, Geuking MB & McCoy KD (2013) Intestinal Microbial  
432 Diversity during Early-Life Colonization Shapes Long-Term IgE Levels. *Cell Host*  
433 *Microbe* 14: 559–570
- 434 Cai Y, Shen X, Ding C, Qi C, Li K, Li X, Jala VR, Zhang H ge, Wang T, Zheng J, *et al*  
435 (2011) Pivotal Role of Dermal IL-17-Producing gd T Cells in Skin Inflammation.  
436 *Immunity* 35: 596–610
- 437 Cai Y, Xue F, Fleming C, Yang J, Ding C, Ma Y, Liu M, Zhang HG, Zheng J, Xiong N, *et*  
438 *al* (2014) Differential developmental requirement and peripheral regulation for  
439 dermal V $\gamma$ 34 and V $\gamma$ 36T17 cells in health and inflammation. *Nat Commun* 5: 1–14
- 440 Chen YS, Chen IB, Pham G, Shao TY, Bangar H, Way SS & Haslam DB (2020) IL-17-  
441 producing  $\gamma\delta$  T cells protect against *Clostridium difficile* infection. *J Clin Invest* 130:  
442 2377–2390
- 443 Conti HR, Peterson AC, Brane L, Huppler AR, Herná'ndez-Santos N, Whibley N, Garg  
444 A V., Simpson-Abelson MR, Gibson GA, Mamo AJ, *et al* (2014) Oral-resident  
445 natural Th17 cells and  $\gamma\delta$  T cells control opportunistic *Candida albicans* infections.  
446 *J Exp Med* 211: 2075–2084
- 447 Eberl G (2016) Immunity by equilibrium. *Nat Rev Immunol* 16: 524–532
- 448 Eberl G & Litman DR (2004) Thymic origin of intestinal  $\alpha\beta$  T cells revealed by fate  
449 mapping of ROR $\gamma$ t+ cells. *Science (80- )* 305: 248–251
- 450 Fleming C, Cai Y, Sun X, Jala VR, Xue F, Morrissey S, Wei YL, Chien YH, Zhang HG,  
451 Haribabu B, *et al* (2017) Microbiota-activated CD103+ DCs stemming from

- 452 microbiota adaptation specifically drive  $\gamma\delta$ T17 proliferation and activation.
- 453 *Microbiome* 5: 1–15
- 454 Gardam S, Turner VM, Anderton H, Limaye S, Basten A, Koentgen F, Vaux DL, Silke J  
455 & Brink R (2011) Deletion of cIAP1 and cIAP2 in murine B lymphocytes  
456 constitutively activates cell survival pathways and inactivates the germinal center  
457 response. *Blood* 117: 4041–4051
- 458 Guo X, Liang Y, Zhang Y, Lasorella A, Kee BL & Fu YX (2015) Innate Lymphoid Cells  
459 Control Early Colonization Resistance against Intestinal Pathogens through ID2-  
460 Dependent Regulation of the Microbiota. *Immunity* 42: 731–743
- 461 Guo X, Qiu J, Tu T, Yang X, Deng L, Anders RA, Zhou L & Fu YX (2014) Induction of  
462 innate lymphoid cell-derived interleukin-22 by the transcription factor STAT3  
463 mediates protection against intestinal infection. *Immunity*
- 464 Gury-BenAri M, Thaïss CA, Serafini N, Winter DR, Giladi A, Lara-Astiaso D, Levy M,  
465 Salame TM, Weiner A, David E, *et al* (2016) The Spectrum and Regulatory  
466 Landscape of Intestinal Innate Lymphoid Cells Are Shaped by the Microbiome. *Cell*  
467 166: 1231-1246.e13
- 468 Haas JD, Malinarich González FH, Schmitz S, Chennupati V, Föhse L, Kremmer E,  
469 Förster R & Prinz I (2009) CCR6 and NK1.1 distinguish between IL-17A and IFN- $\gamma$ -  
470 producing  $\gamma\delta$  effector T cells. *Eur J Immunol* 39: 3488–3497
- 471 Haas JD, Ravens S, Düber S, Sandrock I, Oberdörfer L, Kashani E, Chennupati V,  
472 Föhse L, Naumann R, Weiss S, *et al* (2012) Development of Interleukin-17-  
473 Producing  $\gamma\delta$  T Cells Is Restricted to a Functional Embryonic Wave. *Immunity* 37:  
474 48–59
- 475 Hayden MS & Ghosh S (2011) NF- $\kappa$ B in immunobiology. *Cell Res* 21: 223–244

- 476 Heilig JS & Tonegawa S (1986) Diversity of murine gamma genes and expression in  
477 fetal and adult T lymphocytes. *Nature* 322: 836–840
- 478 Hoytema van Konijnenburg DP, Reis BS, Pedicord VA, Farache J, Victora GD & Mucida  
479 D (2017) Intestinal Epithelial and Intraepithelial T Cell Crosstalk Mediates a  
480 Dynamic Response to Infection. *Cell* 171: 783-794.e13
- 481 Jie Z, Yang JY, Gu M, Wang H, Xie X, Li Y, Liu T, Zhu L, Shi J, Zhang L, *et al* (2018)  
482 NIK signaling axis regulates dendritic cell function in intestinal immunity and  
483 homeostasis. *Nat Immunol* 19: 1224–1235
- 484 Kadekar D, Agerholm R, Rizk J, Neubauer HA, Suske T, Maurer B, Viñals MT, Comelli  
485 EM, Taibi A, Moriggl R, *et al* (2020) The neonatal microenvironment programs  
486 innate  $\gamma\delta$  T cells through the transcription factor STAT5. *J Clin Invest* 130: 2496–  
487 2508
- 488 Kalliolias GD & Ivashkiv LB (2016) TNF biology, pathogenic mechanisms and emerging  
489 therapeutic strategies. *Nat Rev Rheumatol* 12: 49–62
- 490 Kawalkowska JZ, Ogbечи J, Venables PJ & Williams RO (2019) CIAP1/2 inhibition  
491 synergizes with TNF inhibition in autoimmunity by down-regulating IL-17A and  
492 inducing Tregs. *Sci Adv* 5: eaaw5422
- 493 Kiss EA, Vonarbourg C, Kopfmann S, Hobeika E, Finke D, Esser C & Diefenbach A  
494 (2011) Natural aryl hydrocarbon receptor ligands control organogenesis of intestinal  
495 lymphoid follicles. *Science* (80- ) 334: 1561–1565
- 496 Klose CSN, Kiss EA, Schwierzeck V, Ebert K, Hoyler T, D’Hargues Y, Göppert N,  
497 Croxford AL, Waisman A, Tanriver Y, *et al* (2013) A T-bet gradient controls the fate  
498 and function of CCR6-ROR $\gamma$ t + innate lymphoid cells. *Nature* 494: 261–265
- 499 Kruglov AA, Grivennikov SI, Kuprash D V., Winsauer C, Prepens S, Seleznik GM, Eberl

500 G, Littman DR, Heikenwalder M, Tumanov A V., *et al* (2013) Nonredundant function  
501 of soluble Itα3 produced by innate lymphoid cells in intestinal homeostasis. *Science*  
502 (80- ) 342: 1243–1246

503 Lacher SM, Thurm C, Distler U, Mohebiany AN, Israel N, Kitic M, Ebering A, Tang Y,  
504 Klein M, Wabnitz GH, *et al* (2018) NF-κB inducing kinase (NIK) is an essential post-  
505 transcriptional regulator of T-cell activation affecting F-actin dynamics and TCR  
506 signaling. *J Autoimmun* 94: 110–121

507 St. Leger AJ, Desai J V., Drummond RA, Kugadas A, Almaghrabi F, Silver P,  
508 Raychaudhuri K, Gadjeva M, Iwakura Y, Lionakis MS, *et al* (2017) An Ocular  
509 Commensal Protects against Corneal Infection by Driving an Interleukin-17  
510 Response from Mucosal γδ T Cells. *Immunity* 47: 148-158.e5

511 Mahoney DJ, Cheung HH, Mrad RL, Plenchette S, Simard C, Enwere E, Arora V, Mak  
512 TW, Lacasse EC, Waring J, *et al* (2008) Both cIAP1 and cIAP2 regulate TNF -  
513 mediated NF- B activation. *Proc Natl Acad Sci* 105: 11778–11783

514 Mair F, Joller S, Hoeppli R, Onder L, Hahn M, Ludewig B, Waisman A & Becher B  
515 (2015) The NFκB-inducing kinase is essential for the developmental programming  
516 of skin- resident and IL-17-producing Γδ Tδ cells. *Elife* 4

517 Di Marco Barros R, Roberts NA, Dart RJ, Vantourout P, Jandke A, Nussbaumer O,  
518 Deban L, Cipolat S, Hart R, Iannitto ML, *et al* (2016) Epithelia Use Butyrophilin-like  
519 Molecules to Shape Organ-Specific γδ T Cell Compartments. *Cell* 167: 203-  
520 218.e17

521 Matsuzawa A, Tseng PH, Vallabhapurapu S, Luo JL, Zhang W, Wang H, Vignali DAA,  
522 Gallagher E & Karin M (2008) Essential cytoplasmic translocation of a cytokine  
523 receptor-assembled signaling complex. *Science* (80- ) 321: 663–668

- 524 McGinley AM, Sutton CE, Edwards SC, Leane CM, DeCoursey J, Teijeiro A, Hamilton  
525 JA, Boon L, Djouder N & Mills KHG (2020) Interleukin-17A Serves a Priming Role  
526 in Autoimmunity by Recruiting IL-1 $\beta$ -Producing Myeloid Cells that Promote  
527 Pathogenic T Cells. *Immunity* 52: 342-356.e6
- 528 Michel M-L, Pang DJ, Haque SFY, Potocnik AJ, Pennington DJ & Hayday AC (2012)  
529 Interleukin 7 (IL-7) selectively promotes mouse and human IL-17-producing cells.  
530 *Proc Natl Acad Sci* 109: 17549–17554
- 531 Al Nabhani Z, Dulauroy S, Marques R, Cousu C, Al Bounny S, Déjardin F, Sparwasser  
532 T, Bérard M, Cerf-Bensussan N & Eberl G (2019) A Weaning Reaction to  
533 Microbiota Is Required for Resistance to Immunopathologies in the Adult Cell Press
- 534 Oh H & Ghosh S (2013) NF- $\kappa$ B: Roles and regulation in different CD4<sup>+</sup> T-cell subsets.  
535 *Immunol Rev* 252: 41–51
- 536 Omenetti S, Bussi C, Metidji A, Iseppon A, Lee S, Tolaini M, Li Y, Kelly G, Chakravarty  
537 P, Shoaie S, *et al* (2019) The Intestine Harbors Functionally Distinct Homeostatic  
538 Tissue-Resident and Inflammatory Th17 Cells. *Immunity* 51: 77-89.e6
- 539 Parker ME, Barrera A, Wheaton JD, Zuberbuehler MK, Allan DSJ, Carlyle JR, Reddy  
540 TE & Ciofani M (2019) c-Maf regulates the plasticity of group 3 innate lymphoid  
541 cells by restraining the type 1 program. *J Exp Med*: jem.20191030
- 542 Parker ME & Ciofani M (2020) Regulation of  $\gamma\delta$  T Cell Effector Diversification in the  
543 Thymus. *Front Immunol* 11: 42
- 544 Patil RS, Bhat SA, Dar AA & Chiplunkar S V (2015) The Jekyll and Hyde story of IL17-  
545 Producing  $\gamma\delta$ T Cells. *Front Immunol* 6: 37
- 546 Powolny-Budnicka I, Riemann M, Tänzer S, Schmid RM, Hehlhans T & Weih F (2011)  
547 RelA and RelB transcription factors in distinct thymocyte populations control

548 lymphotoxin-dependent interleukin-17 production in  $\gamma\delta$  T cells. *Immunity* 34: 364–  
549 374

550 Ramakrishnan P, Wang W & Wallach D (2004) Receptor-specific signaling for both the  
551 alternative and the canonical NF- $\kappa$ B activation pathways by NF- $\kappa$ B-inducing kinase.  
552 *Immunity* 21: 477–489

553 Ribot JC, DeBarros A, Pang DJ, Neves JF, Peperzak V, Roberts SJ, Girardi M, Borst J,  
554 Hayday AC, Pennington DJ, *et al* (2009) CD27 is a thymic determinant of the  
555 balance between interferon- $\gamma$ - and interleukin 17-producing  $\gamma\delta$  T cell subsets. *Nat*  
556 *Immunol* 10: 427–436

557 Rizk J, Kaplinsky J, Agerholm R, Kadekar D, Ivars F, Agace WW, Wei-Lynn Wong W,  
558 Szucs MJ, Myers SA, Carr SA, *et al* (2019) SMAC mimetics promote NIK-  
559 dependent inhibition of CD4+ TH17 cell differentiation. *Sci Signal* 12

560 Sandrock I, Reinhardt A, Ravens S, Binz C, Wilharm A, Martins J, Oberdörfer L, Tan L,  
561 Lienenklaus S, Zhang B, *et al* (2018) Genetic models reveal origin, persistence and  
562 non-redundant functions of IL-17–producing  $\gamma\delta$  T cells. *J Exp Med* 215: 3006–3018

563 Schindelin J, Arganda-Carreras I, Frise E, Kaynig V, Longair M, Pietzsch T, Preibisch S,  
564 Rueden C, Saalfeld S, Schmid B, *et al* (2012) Fiji: an open-source platform for  
565 biological-image analysis. *Nat Methods* 9: 676–682

566 Sheridan BS, Romagnoli PA, Pham QM, Fu HH, Alonzo F, Schubert WD, Freitag NE &  
567 Lefrançois L (2013)  $\gamma\delta$  T Cells Exhibit Multifunctional and Protective Memory in  
568 Intestinal Tissues. *Immunity* 39: 184–195

569 Shibata K, Yamada H, Sato T, Dejima T, Nakamura M, Ikawa T, Hara H, Yamasaki S,  
570 Kageyama R, Iwakura Y, *et al* (2011) Notch-Hes1 pathway is required for the  
571 development of IL-17-producing  $\gamma\delta$  T cells. *Blood* 118: 586–593



- 572 Silberger DJ, Zindl CL & Weaver CT (2017) *Citrobacter rodentium*: a model  
573 enteropathogen for understanding the interplay of innate and adaptive components  
574 of type 3 immunity. *Mucosal Immunol* 10: 1108–1117
- 575 Silke J & Meier P (2013) Inhibitor of apoptosis(IAP)proteins-modulators of cell death  
576 and inflammation. *Cold Spring Harb Perspect Biol* 5: a008730
- 577 Silva-Santos B, Pennington DJ & Hayday AC (2005) Lymphotoxin-mediated regulation  
578 of  $\gamma\delta$  cell differentiation by  $\alpha\beta$  T cell progenitors. *Science (80- )* 307: 925–928
- 579 Spits H, Artis D, Colonna M, Diefenbach A, Di Santo JP, Eberl G, Koyasu S, Locksley  
580 RM, McKenzie ANJ, Mebius RE, *et al* (2013) Innate lymphoid cells-a proposal for  
581 uniform nomenclature. *Nat Rev Immunol* 13: 145–149
- 582 Steer CA, Mathä L, Shim H & Takei F (2020) Lung group 2 innate lymphoid cells are  
583 trained by endogenous IL-33 in the neonatal period. *JCI Insight* 5
- 584 Vallabhapurapu S, Matsuzawa A, Zhang W, Tseng P-H, Keats JJ, Wang H, Vignali  
585 DAA, Bergsagel PL & Karin M (2008) Nonredundant and complementary functions  
586 of TRAF2 and TRAF3 in a ubiquitination cascade that activates NIK-dependent  
587 alternative NF- $\kappa$ B signaling. *Nat Immunol* 9: 1364–1370
- 588 Varfolomeev E, Blankenship JW, Wayson SM, Fedorova A V, Kayagaki N, Garg P,  
589 Zobel K, Dynek JN, Elliott LO, Wallweber HJA, *et al* (2007) IAP Antagonists Induce  
590 Autoubiquitination of c-IAPs, NF- $\kappa$ B Activation, and TNF $\alpha$ -Dependent Apoptosis.  
591 *Cell* 131: 669–681
- 592 Vince JE, Wong WWL, Khan N, Feltham R, Chau D, Ahmed AU, Benetatos CA,  
593 Chunduru SK, Condon SM, McKinlay M, *et al* (2007) IAP Antagonists Target cIAP1  
594 to Induce TNF $\alpha$ -Dependent Apoptosis. *Cell* 131: 682–693
- 595 Wiede F, Dudakov JA, Lu KH, Dodd GT, Butt T, Godfrey DI, Strasser A, Boyd RL &

596 Tiganis T (2017) PTPN2 regulates T cell lineage commitment and  $\alpha\beta$  versus  $\gamma\delta$   
597 specification. *J Exp Med* 214: 2733–2758

598 Zarnegar BJ, Wang Y, Mahoney DJ, Dempsey PW, Cheung HH, He J, Shiba T, Yang X,  
599 Yeh WC, Mak TW, *et al* (2008) Noncanonical NF- $\kappa$ B activation requires coordinated  
600 assembly of a regulatory complex of the adaptors cIAP1, cIAP2, TRAF2 and  
601 TRAF3 and the kinase NIK. *Nat Immunol* 9: 1371–1378

602 Zuberbuehler MK, Parker ME, Wheaton JD, Espinosa JR, Salzler HR, Park E & Ciofani  
603 M (2019) The transcription factor c-Maf is essential for the commitment of IL-17-  
604 producing  $\gamma\delta$  T cells. *Nat Immunol* 20: 73–85

605

606

## 607 **Materials and methods**

### 608 **Mice**

609 All animals were bred and maintained in-house at DTU health tech with the approval of  
610 the Danish animal experiments inspectorate. cIAP1<sup>ff</sup> and cIAP1<sup>ff</sup> cIAP2<sup>-/-</sup> mice were  
611 provided by Prof. W. Wei-Lynn Wong at the University of Zurich, Switzerland with the  
612 permission of Prof. John Silke, VIC Australia. RORγt<sup>CRE</sup> mice were provided by Prof.  
613 Gerard Eberl at Pasteur Institute, Paris, France. ROSA26-floxSTOPflox-RFP mice were  
614 from the Swiss Immunological Mouse Repository (SwImMR). Lymph nodes from  
615 TNFR1<sup>-/-</sup> mice were provided by Prof. William Agace at Lund University, Sweden, while  
616 Lymph nodes from cIAP1<sup>UBA</sup> mutant mice were provided by Prof. Pascal Meier at The  
617 Institute of Cancer research, UK.

### 618 **Cell culture media and buffers**

619 For all preparations of single cell suspensions and cell cultures RPMI 1460 (Invitrogen)  
620 supplemented with 10% heat inactivated FBS (GIBCO), 20mM HEPES pH 7.4 (Gibco),  
621 50 μM 2-mercaptoethanol, 2 mM L-glutamine (Gibco) and 10,000 U/ mL penicillin-  
622 streptomycin (Gibco), was used. Where indicated, IMDM (Invitrogen) was used instead  
623 of RPMI 1460 and supplemented as aforementioned. FACS buffer was prepared by  
624 supplementing PBS with 3% heat inactivated FBS.

### 625 **Lymphocyte isolation from mouse organs**

626 Lymphocytes were isolated from peripheral lymph nodes (axial, brachial and inguinal),  
627 thymus, ear skin, small intestinal and colonic lamina propria following the previously  
628 described protocols (Kadekar *et al*, 2020). Lymphocytes were isolated from cervical and  
629 auricular lymph nodes in case of IMQ-induced psoriasis.

### 630 **Ex-vivo culturing of lymphocytes**

631 For staining of cytokines from lymphocytes that were isolated from peripheral lymph  
632 nodes of untreated mice, the cells were plated at a density of  $10 \times 10^6$  cells /ml in 1ml of  
633 supplemented RPMI in 12 well plates. The cells were restimulated with 50ng/ml PMA  
634 (phorbol myristate acetate; Sigma Aldrich), 750 ng/ml Ionomycin (Sigma Aldrich) and  
635 BD GolgiStop (containing monensin at 1:1000 dilution, BD) and cultured for 3.5 hours at  
636 37°C. For estimation of IL-22 production by CD4<sup>+</sup> and  $\gamma\delta^+$  T cells from homeostatic  
637 mice, the lymphocytes were first cultured overnight with 40ng/ml rIL-23 (R&D) the  
638 restimulated with PMA, Ionomycin and BD GolgiStop as aforementioned. The cells  
639 were then harvested and used for flow cytometry staining.

640 In case of lymphocytes that were isolated from peripheral lymph nodes or skin in IMQ-  
641 experiments, the cells were plated at a density of  $5 \times 10^6$  cells /ml in 1ml of supplemented  
642 IMDM in 24 well plates. The cells were restimulated with 50ng/ml PMA (phorbol  
643 myristate acetate; Sigma Aldrich), 750 ng/ml Ionomycin (Sigma Aldrich) and BD  
644 Golgiplug (containing Brefeldin A at 1:1000 dilution, BD) and cultured for 3.5 hours at  
645 37°C. The cells were then harvested and used for flow cytometry staining.

646 Alternatively, lymphocytes that were isolated from mesenteric lymph nodes or colonic  
647 lamina propria in *Citrobacter rodentium* infection experiments, the cells were plated at a  
648 density of  $5 \times 10^6$  cells /ml in 1ml of supplemented IMDM in 24 well plates. The cells were  
649 subsequently treated with 40ng/ml rIL-23 (R&D) for 3 hours, followed by 50ng/ml PMA  
650 (phorbol myristate acetate; Sigma Aldrich), 750 ng/ml Ionomycin (Sigma Aldrich) and  
651 BD Golgiplug (containing Brefeldin A at 1:1000 dilution, BD) and cultured for an  
652 additional 3.5 hours at 37°C.

653 For cell cycle assay experiments, lymphocytes that were isolated from peripheral lymph  
654 nodes of mice, were plated at a density of  $5 \times 10^6$  cells /ml in 1ml of supplemented RPMI

655 in 24 well plates. The cells were treated with either 20ng/ml rmlL-7 (R&D) or with 10  
656 ng/ml rmlL-1 $\beta$  (Biolegend) + 20 ng/ml rmlL-23 (R&D) for 48 hours. The cells were  
657 subsequently harvested for flow cytometry staining.

### 658 **IMQ-induced psoriasis**

659 Psoriasis was induced in mice by applying 7 mg of Aldara cream (containing 5%  
660 imiquimod) to the dorsal side of each ear for 7 days. Histological sections were  
661 prepared by fixing ear tissue in 10% formalin overnight and then paraffin embedded.  
662 The paraffin embedded sections were cut and stained by H&E.

### 663 **Flow cytometry staining**

664 Surface antigens, intracellular cytokines and cell cycle assay were stained for flow  
665 cytometry as previously described (Rizk *et al*, 2019). For transcription factor staining,  
666 the cells were first stained for live/dead discrimination followed by surface antigen  
667 staining and subsequently fixed using Foxp3 fixation/permeabilization buffer (Thermo  
668 Fisher) for 1 hour at 4°C. The cells were washed once with then stained with the desired  
669 antibodies in Foxp3 perm/wash buffer for 1 hour at 4°C. The cells were washed once  
670 again and resuspended in FACS buffer and analyzed using BD LSRFortessa.

671 The following antibodies were used herein at 1:200 dilution unless otherwise indicated:

672 Fixed viability stain-700 (FVS700, BD, 1:1000), anti-IL-17A (TC11-18H10; BV786 and  
673 PE), anti-IFN $\gamma$  (XMG1.2; PE-Cy7, APC, BV711 and Percp-cy5.5), anti-IL-22  
674 (1H8PWSR; PE), anti-cMAF (symOF1; PE, eF660 or Percp-Cy5.5; 5  $\mu$ L/test), anti-CD4  
675 (GK1.5; BUV395 and FITC), anti-TCR $\gamma\delta$  (GL3; BV421 and APC), anti-CD27 (LG.3A10;  
676 PE-Cy7 and BV650), anti-CCR6 (140706; Alexa Fluor 647), anti-CD44 (1M7; V500),  
677 anti-CD19 (6D5; FITC), anti-TCR $\beta$  (H57-597; APC-eflour780), anti-CD3e (145-2C11,  
678 PeCF594 and PE), anti-Tbet(4B10; PeCy7), anti- CD8 (53-6.7;FITC), anti-V $\gamma$ 5 (536;

679 FITC), anti-V $\gamma$ 4(UC3-10A6; Percp-eflour710), anti-GATA3(TWAJ; Percp-eFlour710;  
680 1:30), anti-CD45(30-F11;PE and V500), anti-CD127 (SB/199; BUV737) and anti-ROR $\gamma$ t  
681 (B2D; APC and PE).

## 682 **Administration of Anti-TNF**

683 For neutralization of TNF, 1 week old pups were weighed and i.p. injected with the a-  
684 TNF (Adalimumab, brand name HUMIRA) at 5 mg/kg body weight once a week until  
685 weaning. After weaning the mice were i.p. injected with 10 mg/kg body weight twice a  
686 week until euthanasia at approximately 12 weeks of age.

## 687 **Transfer of neonatal $\gamma\delta$ T cells to RAG1<sup>-/-</sup> hosts.**

688 First, thymi from 1-2 days old mice were isolated and crushed individually against 70  $\mu$ m  
689 filter to prepare single cell solutions. Subsequently, total  $\gamma\delta$  T cells were enriched by  
690 magnetic depletion of CD4<sup>+</sup>, CD8<sup>+</sup>, TCR $\beta$ <sup>+</sup> cells as follows: total thymocytes were re-  
691 suspended in MACS buffer at 1e8 cells/ml containing 50  $\mu$ L/ml normal rat serum and  
692 1:200 biotin labelled anti-CD4<sup>+</sup> (GK1.5), CD8<sup>+</sup> (53-6.7) and TCR $\beta$ <sup>+</sup> (H57-597)  
693 antibodies; the cells were incubated for 10 minutes at room temperature and then  
694 incubated with 75  $\mu$ L/ml EasySep RaphidSphere streptavidin beads (#50001) for 2.5  
695 minutes then transferred to EasySep magnet for 2.5 minutes. The non-bound fraction  
696 was collected by decantation and centrifugated for 5 minutes at 400g at 4°C.. The  
697 enriched  $\gamma\delta$  T cells from each donor mouse were re-suspended in PBS and then i.v.  
698 injected into the tail vein of a RAG1<sup>-/-</sup> host. The RAG1<sup>-/-</sup> hosts were euthanized for  
699 collection of organs after 12 weeks.

## 700 **Bone marrow chimeras**

701 The bone marrow cells for reconstitution were isolated by flushing the tibia and femur,  
702 which were dissected from donor mice, with culture media. Total bone marrow cells

703 were then centrifuged at 400g for 5 minutes at 4°C. The cells were then re-suspended  
704 and passed through 70 µm filter. Subsequently, red blood cells were then lysed using  
705 RBC lysis buffer (Biolegend) and a single cell suspension of bone marrow cells was the  
706 prepared by passing the cells through 40 µm filter. The prepared cells were then  
707 counted and mixed as appropriate.

708 Conversely, host mice were sub-lethally irradiated by 2 doses of 4.5 Gy that were at  
709 least 4 hours apart. After 24 hours, the hosts were reconstituted with 10e6 bone marrow  
710 cells that were i.v. injected into the tail vein of the host mice. The hosts were euthanized  
711 for organs after at least 12 weeks.

### 712 **Immunofluorescent imaging of intestinal tissue**

713 To assess the presence of SILT in the intestines of WT or  $\Delta$ IAP1/2 by confocal laser  
714 microscopy, the distal ileum was taken and flushed once with HBSS (Thermo Fisher) to  
715 remove intestinal contents. Cleaned intestines were fixed for 8h in 4% PFA (Sigma-  
716 Aldrich) in PBS and stored in washing buffer (PBS+5%FCS+0.2% Triton X-100 (Sigma-  
717 Aldrich)+0.01% Thimerosal (Sigma-Aldrich)) until further use. To prepare the collected  
718 intestines for staining, tissues were embedded in 4% UltraPure™ Low Melting Point  
719 Agarose (Thermo Fisher) in PBS, sectioned with a swinging blade microtome (Leica  
720 VT1200S) into 50 micron sections and permeabilized overnight using the Foxp3  
721 Transcription Factor Staining Buffer Set (Thermo Fisher). Permeabilized sections were  
722 stained in the supplied permbuffer with an antibody against ROR $\gamma$ t (AFKJS-9;  
723 unconjugated), followed by a washing step in permbuffer and incubation with a  
724 biotinylated secondary antibody against the primary anti- ROR $\gamma$ t antibody (Biotinylated  
725 anti-rat; Jackson ImmunoResearch). To detect ROR $\gamma$ t<sup>+</sup> ILC and B cells, sections were  
726 washed again in permbuffer and incubated in permbuffer with antibody against B220

727 (RA3-6B2; AF647) and streptavidin-conjugated AF555 (Thermo Fisher), as well as  
728 DAPI (Thermo Fisher) to stain all nucleated cells. Sections were washed one more time,  
729 mounted on glass slides with ProLong Gold (Thermo Fisher) and analyzed using an  
730 LSM710 confocal laser microscope (Carl Zeiss). Images of  $\geq 5$  different sections per  
731 mouse were acquired with the Zeiss Zen v2.3 software (Carl Zeiss) and analyzed using  
732 Imaris v8 (Bitplane/Oxford Instruments) and Fiji v2.1.0/1.53c (Schindelin *et al*, 2012).

### 733 **Murine *Citrobacter rodentium* infection**

734 Starter cultures of *Citrobacter rodentium* strain DBS100 (ATCC 51459; American Type  
735 Culture Collection) were grown overnight at 37°C in Luria-Bertani (LB) medium. The  
736 cultures were then used at 5% v/v to inoculate sterile LB medium. The cultures were  
737 grown at at 37°C to an OD600 of 0.8- 1 and the CFU count was determined from the  
738 OD600 measurement using the following formula:  $CFU/ml = (5 \times 10^8)(OD) - 3 \times 10^7$  .  
739 Subsequently, the bacteria was collected by centrifugation at 4000g for 10 minutes. The  
740 bacterial pellet was then resuspended in LB medium to give at  $2 \times 10^9$  CFU/100  $\mu$ L. To  
741 infect adult mice, the mice were orally gavaged with either 100  $\mu$ L of *Citrobacter*  
742 *rodentium* or LB control. The mice were weighed before oral gavage and once daily until  
743 termination of the experiment. At day 12 post infection all mice were euthanized,  
744 dissected to collect organs and fecal samples.  
745 The collected fecal samples were weighed and dissolved in PBS and then serially  
746 diluted. The serial dilutions were plated on Brilliance™ E. coli/coliform Agar (CM0956,  
747 Thermo Fisher) and incubated overnight at 37°C. *Citrobacter rodentium* colonies were  
748 identified as being pink colonies and enumerated, while E. coli colonies were identified  
749 as purple colonies. CFU/g stool was then calculated as previously described  
750 (Bouladoux *et al*, 2017).



## 751 **Immunofluorescent imaging of nuclear RelB in $\gamma\delta$ T cells**

752 Total lymphocytes were isolated from peripheral (axial, brachial and inguinal), cervical  
753 and auricular lymph nodes of 4 weeks old mice as described above. Subsequently, total  
754  $\gamma\delta$  T cells were enriched by magnetic depletion of CD4<sup>+</sup>, CD8<sup>+</sup>, CD19<sup>+</sup> and TCR $\beta$ <sup>+</sup> cells  
755 as aforementioned. The cells were then stained with FVS700 for discrimination of live  
756 and dead cells and then stained for surface antigens with the following antibodies: anti-  
757 TCR $\gamma\delta$  (GL3; APC), anti-CD27 (LG.3A10; PE-Cy7) and anti-TCR $\beta$  (H57-597; APC-  
758 eflour780) all at 1:200 dilution. The cells were subsequently sorted into TCR $\gamma\delta$ <sup>+</sup> CD27<sup>+</sup>  
759 or TCR $\gamma\delta$ <sup>+</sup> CD27<sup>-</sup> cells using BD ARIA-FUSION cell sorter. The sorted cells were  
760 collected into cell culture medium and centrifuged at 400g for 5 minutes at 4°C. The  
761 cells were then fixed using Foxp3 fixation/permeabilization buffer (Thermo Fisher) for 1  
762 hour at 4°C. The cells were washed once with then stained with Foxp3 perm/wash  
763 buffer containing anti-TCR $\gamma\delta$  (GL3; APC, 1:50), anti-CD3e (145-2C11 or 17A2; biotin,  
764 1:100) and anti-RelB (D-4, Santa-cruz, 1:40) for 1-hour 4°C in Foxp3 perm/wash buffer.  
765 Again, the cells were washed once and stained with streptavidin-conjugated AF488  
766 (Biolegend, 1:100) and anti-mouse AF555 (1:100) for 1 hour 4°C in Foxp3 perm/wash  
767 buffer. The cells were then washed once more as previous and stained with DAPI to  
768 highlight cell nuclei and washed once more with PBS. Washed cells were mounted on a  
769 glass slide using ProLong Gold and imaged with an LSM710 confocal laser microscope  
770 and were acquired and analyzed with the Zen v2.3 software and and Fiji v2.1.0/1.53c  
771 (Schindelin *et al*, 2012).

772

773

774

775 **Figures**

776 **Figure 1**

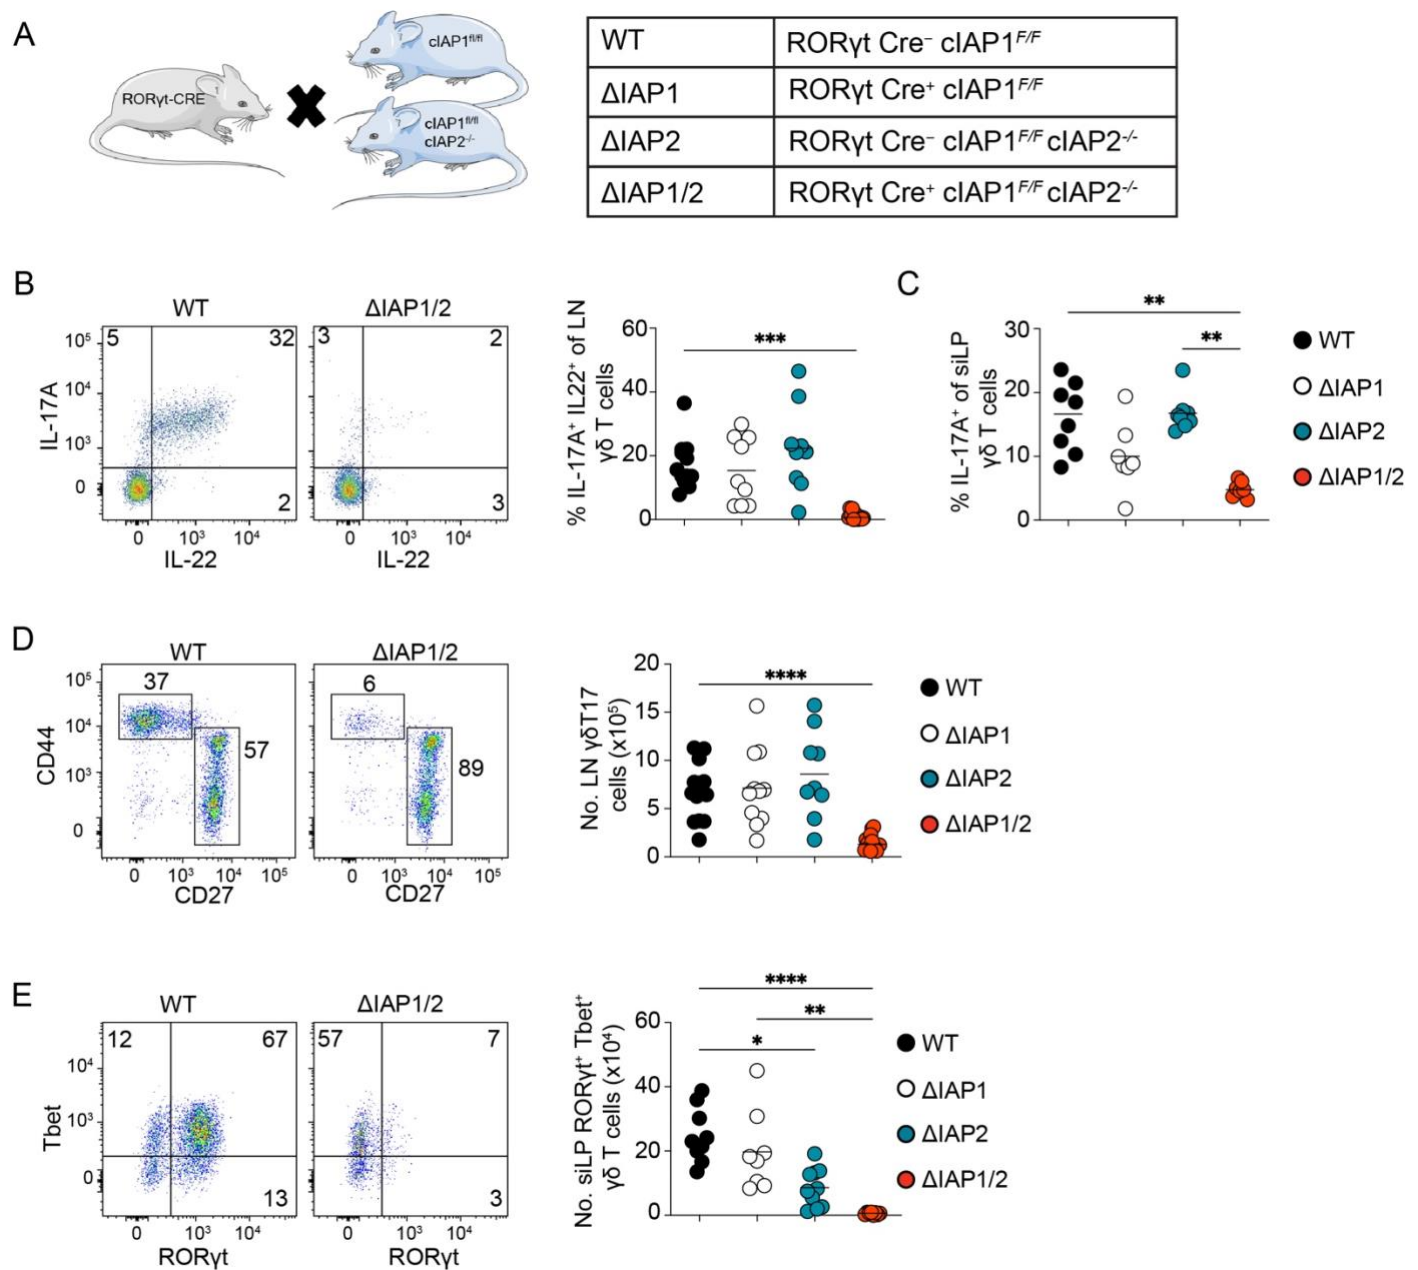

777

778 **Figure 1. cIAP1 and cIAP2 are required for the homeostasis of  $\gamma\delta$ T17 cells in the**

779 **LN and intestinal lamina propria.**

780 (A) Graphical representation of the different mouse strains generated by crossing

781 RORyt<sup>CRE</sup> mice to cIAP1<sup>F/F</sup> or cIAP1<sup>F/F</sup> cIAP2<sup>-/-</sup> mice. Representative flow cytometric

782 analysis (B) and frequency (B-C) of IL-17<sup>+</sup> IL-22<sup>+</sup> cells within  $\gamma\delta$  T cells in the LNs (B) or  
783 (C) IL-17<sup>+</sup> cells within  $\gamma\delta$  T in the siLP. (D) Representative flow cytometric analysis (dot  
784 plots) and numbers (graph) of  $\gamma\delta$ T17 cells in the LNs of adult WT,  $\Delta$ IAP1,  $\Delta$ IAP2 and  
785  $\Delta$ IAP1/2 mice. (E) Representative flow cytometric analysis (dot plots) and numbers  
786 (graph) of ROR $\gamma$ t<sup>+</sup> Tbet<sup>+</sup>  $\gamma\delta$  T cells in the siLP of WT,  $\Delta$ IAP1,  $\Delta$ IAP2 and  $\Delta$ IAP1/2 mice.  
787 In graphs, each symbol represents a mouse, and lines represent the mean, data is pool  
788 of 4 experiments in (B) or 5 experiments in (C-E). \*P < 0.05, \*\*P < 0.01, \*\*\*P < 0.001,  
789 \*\*\*\*P < 0.0001 using Kruskal-Wallis test with Dunn's correction.

790

791

792 **Figure 2**

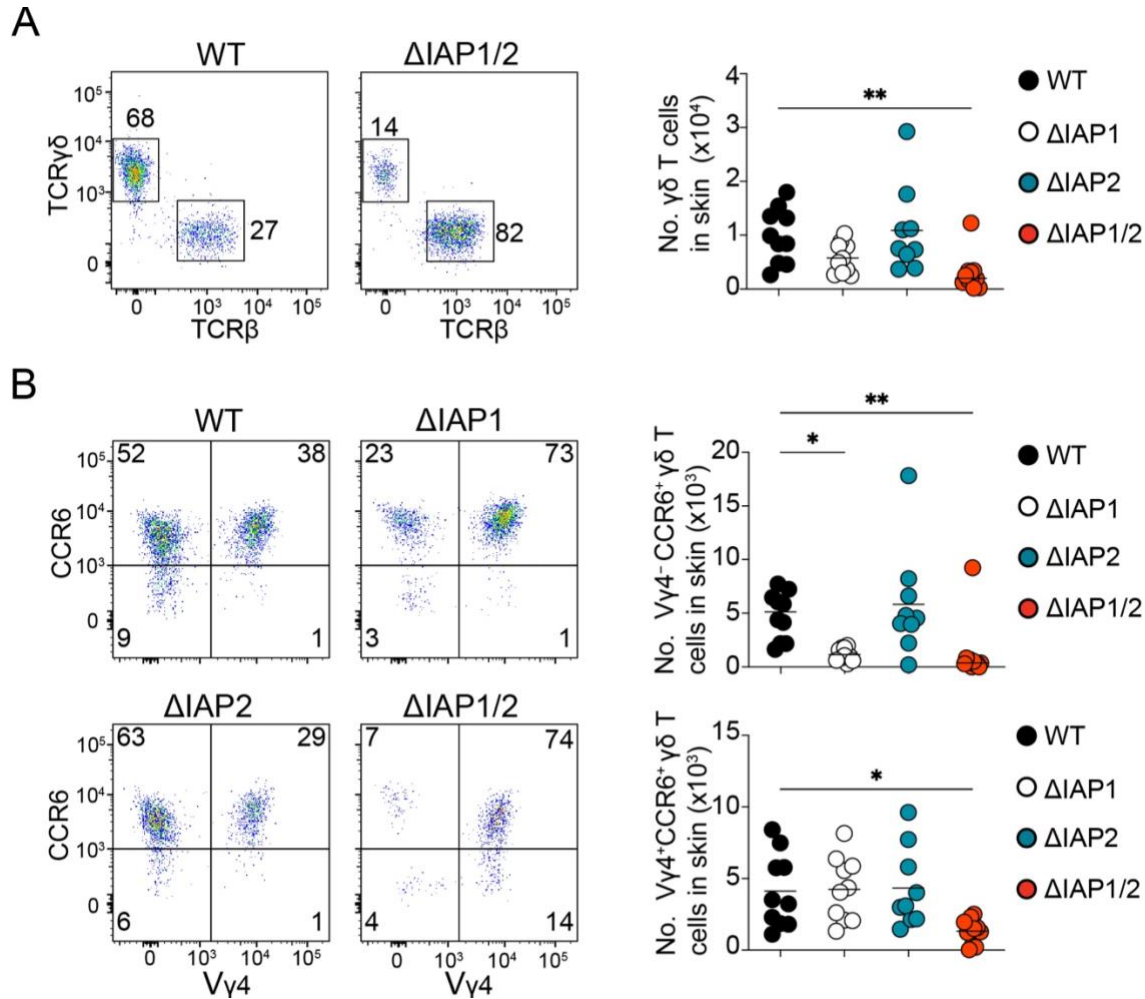

793

794 **Figure 2. cIAP1 and cIAP2 are non-redundantly required for the homeostatic**  
 795 **maintenance of  $\gamma\delta$ T17 cell subsets in the skin.**

796 Representative flow cytometric analysis (dot plots) and numbers (graphs) of (A) total  $\gamma\delta$   
 797 T cells or (B)  $V\gamma 4^+$  and  $V\gamma 4^-$  CCR6 $^+$   $\gamma\delta$  T cells in the skin of WT,  $\Delta$ IAP1,  $\Delta$ IAP2 and  
 798  $\Delta$ IAP1/2 mice. In graphs, each symbol represents a mouse, and lines represent the  
 799 mean, data is pool of 5 experiments in (A-B). \*P < 0.05, \*\*P < 0.01 using Kruskal-Wallis  
 800 test with Dunn's correction.

801

802 **Figure 3**

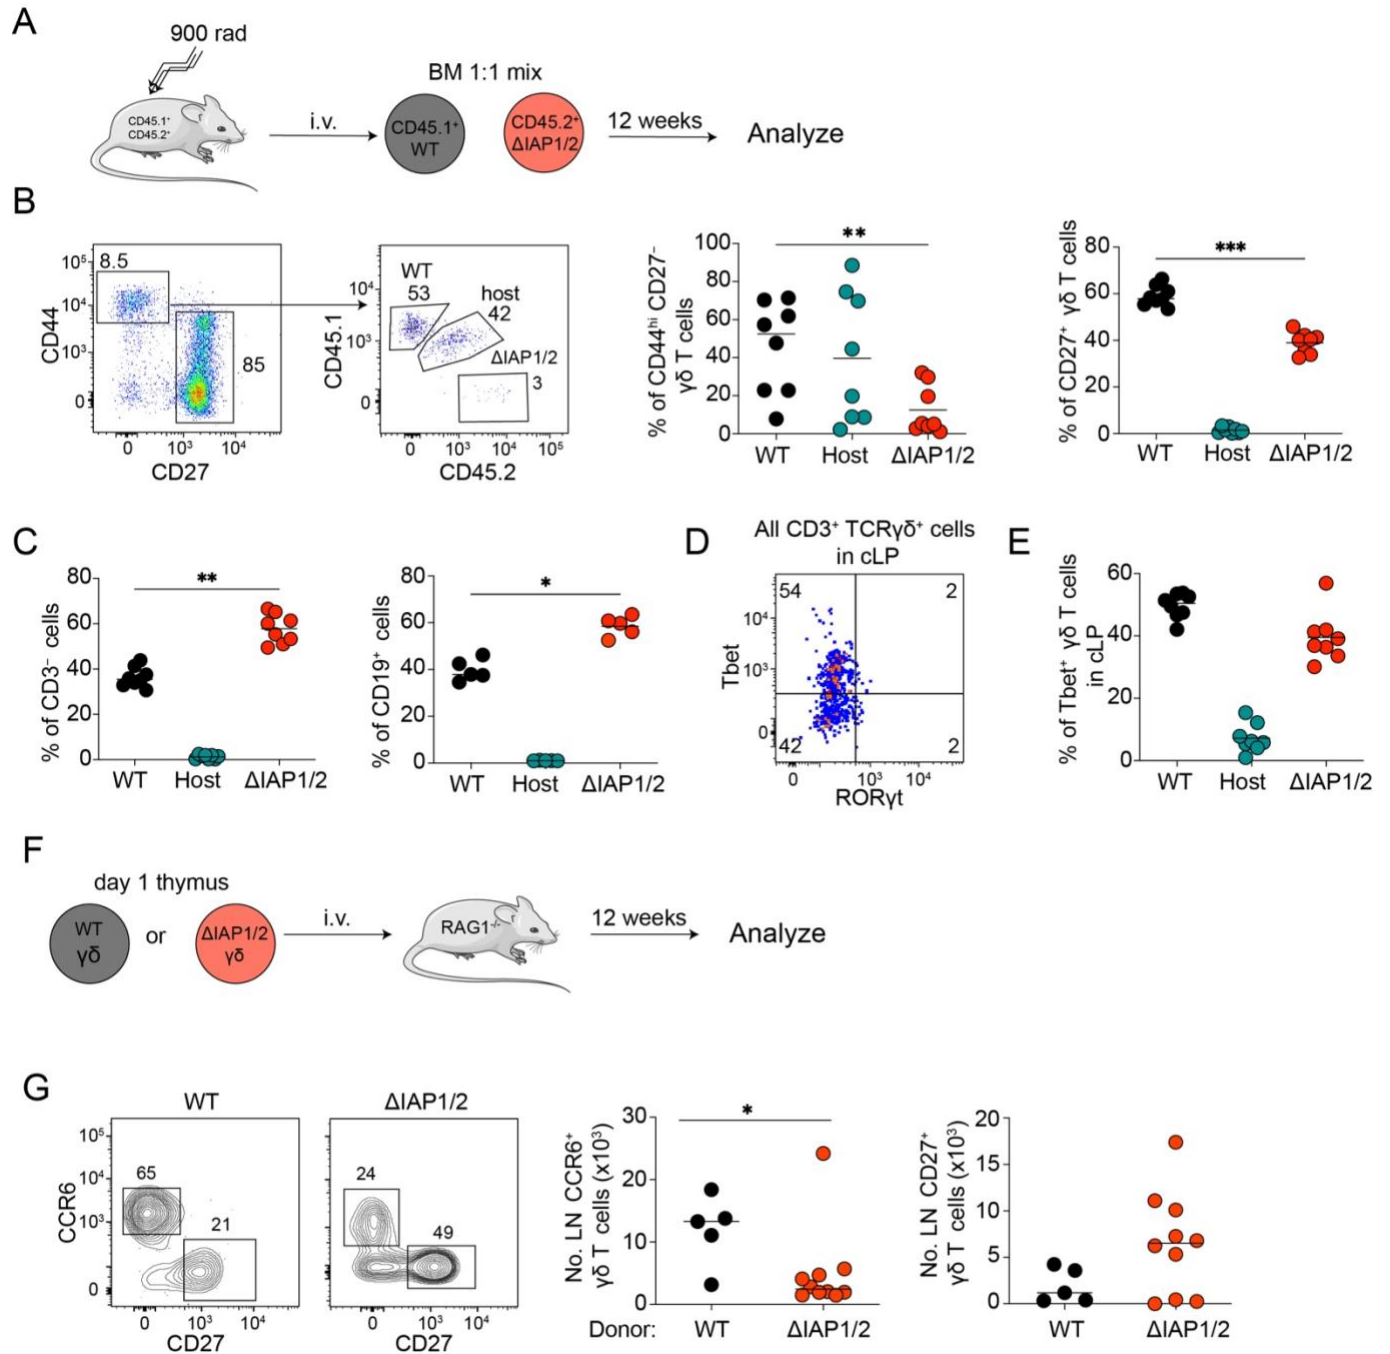

803

804 **Figure 3. cIAP1 and cIAP2 are intrinsically required for the homeostasis of  $\gamma\delta$ T17**

805 **cells.**

806 (A) Graphical representation of the experimental setup for competitive bone marrow

807 experiments. (B) Representative flow cytometric analysis (dot plots) and frequency

808 (graphs) of WT (CD45.1<sup>+</sup>), host (CD45.1<sup>+</sup> CD45.2<sup>+</sup>) or  $\Delta$ IAP1/2 (CD45.2<sup>+</sup>) -derived  
809  $\gamma\delta$ T17 and CD27<sup>+</sup>  $\gamma\delta$  T cells within  $\gamma\delta$  T cells population in the LNs of reconstituted  
810 hosts. (C) Frequency of WT (CD45.1<sup>+</sup>), host (CD45.1<sup>+</sup> CD45.2<sup>+</sup>) or  $\Delta$ IAP1/2 (CD45.2<sup>+</sup>) -  
811 derived CD3<sup>-</sup> and CD19<sup>+</sup> cells in the LNs of reconstituted hosts. (D) Flow cytometric  
812 analysis and (E) frequency of ROR $\gamma$ t<sup>+</sup> and Tbet<sup>+</sup>  $\gamma\delta$  T cells in the cLP of host mice  
813 following bone marrow reconstitution. (B-E) In graphs, each symbol represents a mouse,  
814 and lines represent the mean, data is pool of 3 experiments. \*P < 0.05, \*\*P < 0.01, \*\*\*P  
815 < 0.01 using one-way ANOVA with Tukey's correction. (F) Graphical representation of  
816 the experimental setup for transfer of neonatal  $\gamma\delta$  T cells to RAG1<sup>-/-</sup> recipients. (G) Flow  
817 cytometric analysis (contour plots) and numbers (graphs) of CCR6<sup>+</sup> CD27<sup>-</sup> or CD27<sup>+</sup>  $\gamma\delta$   
818 T cells in the LNs of RAG1<sup>-/-</sup> hosts after transfer of neonatal  $\gamma\delta$  T cells from WT or  
819  $\Delta$ IAP1/2 pups. In graphs, each symbol represents a mouse, and lines represent the  
820 mean, data is pool of 3 experiments (G). \*P < 0.05 using Mann-Whitney test.

821

822 **Figure 4**

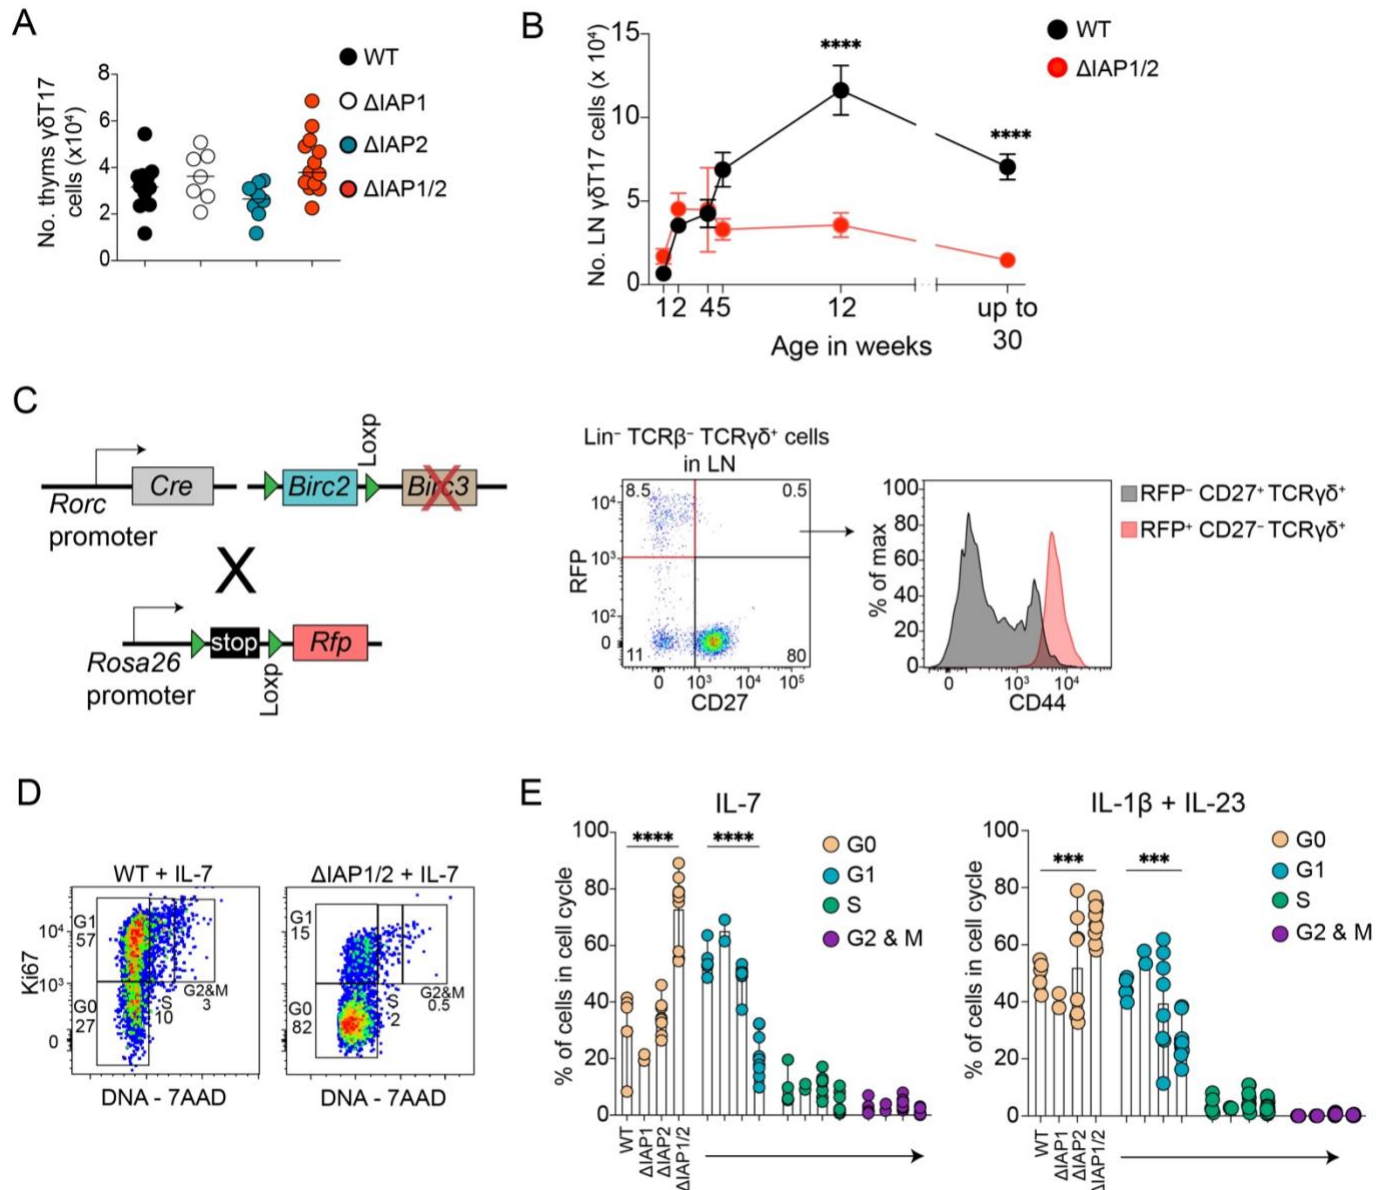

823

824 **Figure 4. ciAP1 and 2 double deficient  $\gamma\delta$ T17 cells are lost progressively during**  
825 **aging and fail to progress through cell cycle.**

826 (A) Numbers of  $\gamma\delta$ T17 cells in the thymi of 1-day old WT,  $\Delta$ IAP1,  $\Delta$ IAP2 and  $\Delta$ IAP1/2  
827 pups. In graph, each symbol represents a mouse, and lines represent the mean, data is  
828 a pool of 3 experiments. (B) Numbers of  $\gamma\delta$ T17 cells in the LN of WT and  $\Delta$ IAP1/2 at the  
829 indicated timepoints. Each symbol represents the mean amalgamated data from each  
830 timepoint and the error bars represents the SEM. \*\*\*\*P < 0.01 using Two-way ANOVA

831 with Holm-Sidak correction. (C) Graphical representation of the genetic makeup of the  
832  $\Delta$ IAP1/2 mice when crossed to the ROSA26-LSL-RFP strain, and representative flow  
833 cytometry analysis of LN  $\gamma\delta$ T17 cells from  $\Delta$ IAP1/2 x ROSA26-LSL-RFP mice. (D)  
834 Representative flow cytometric analysis and (E) frequency of cells in G0, G1, S or G2/M  
835 cell cycle stages within  $\gamma\delta$ T17 cells that were ex-vivo cultured with the indicated  
836 cytokines for 48 hours. In graphs, each symbol represents a mouse, and bars represent  
837 the mean, data is pool of 3 experiments. \*\*\*P < 0.001, \*\*\*\*P < 0.0001 using two-way  
838 ANOVA with Tukey's correction.  
839



840 **Figure 5**

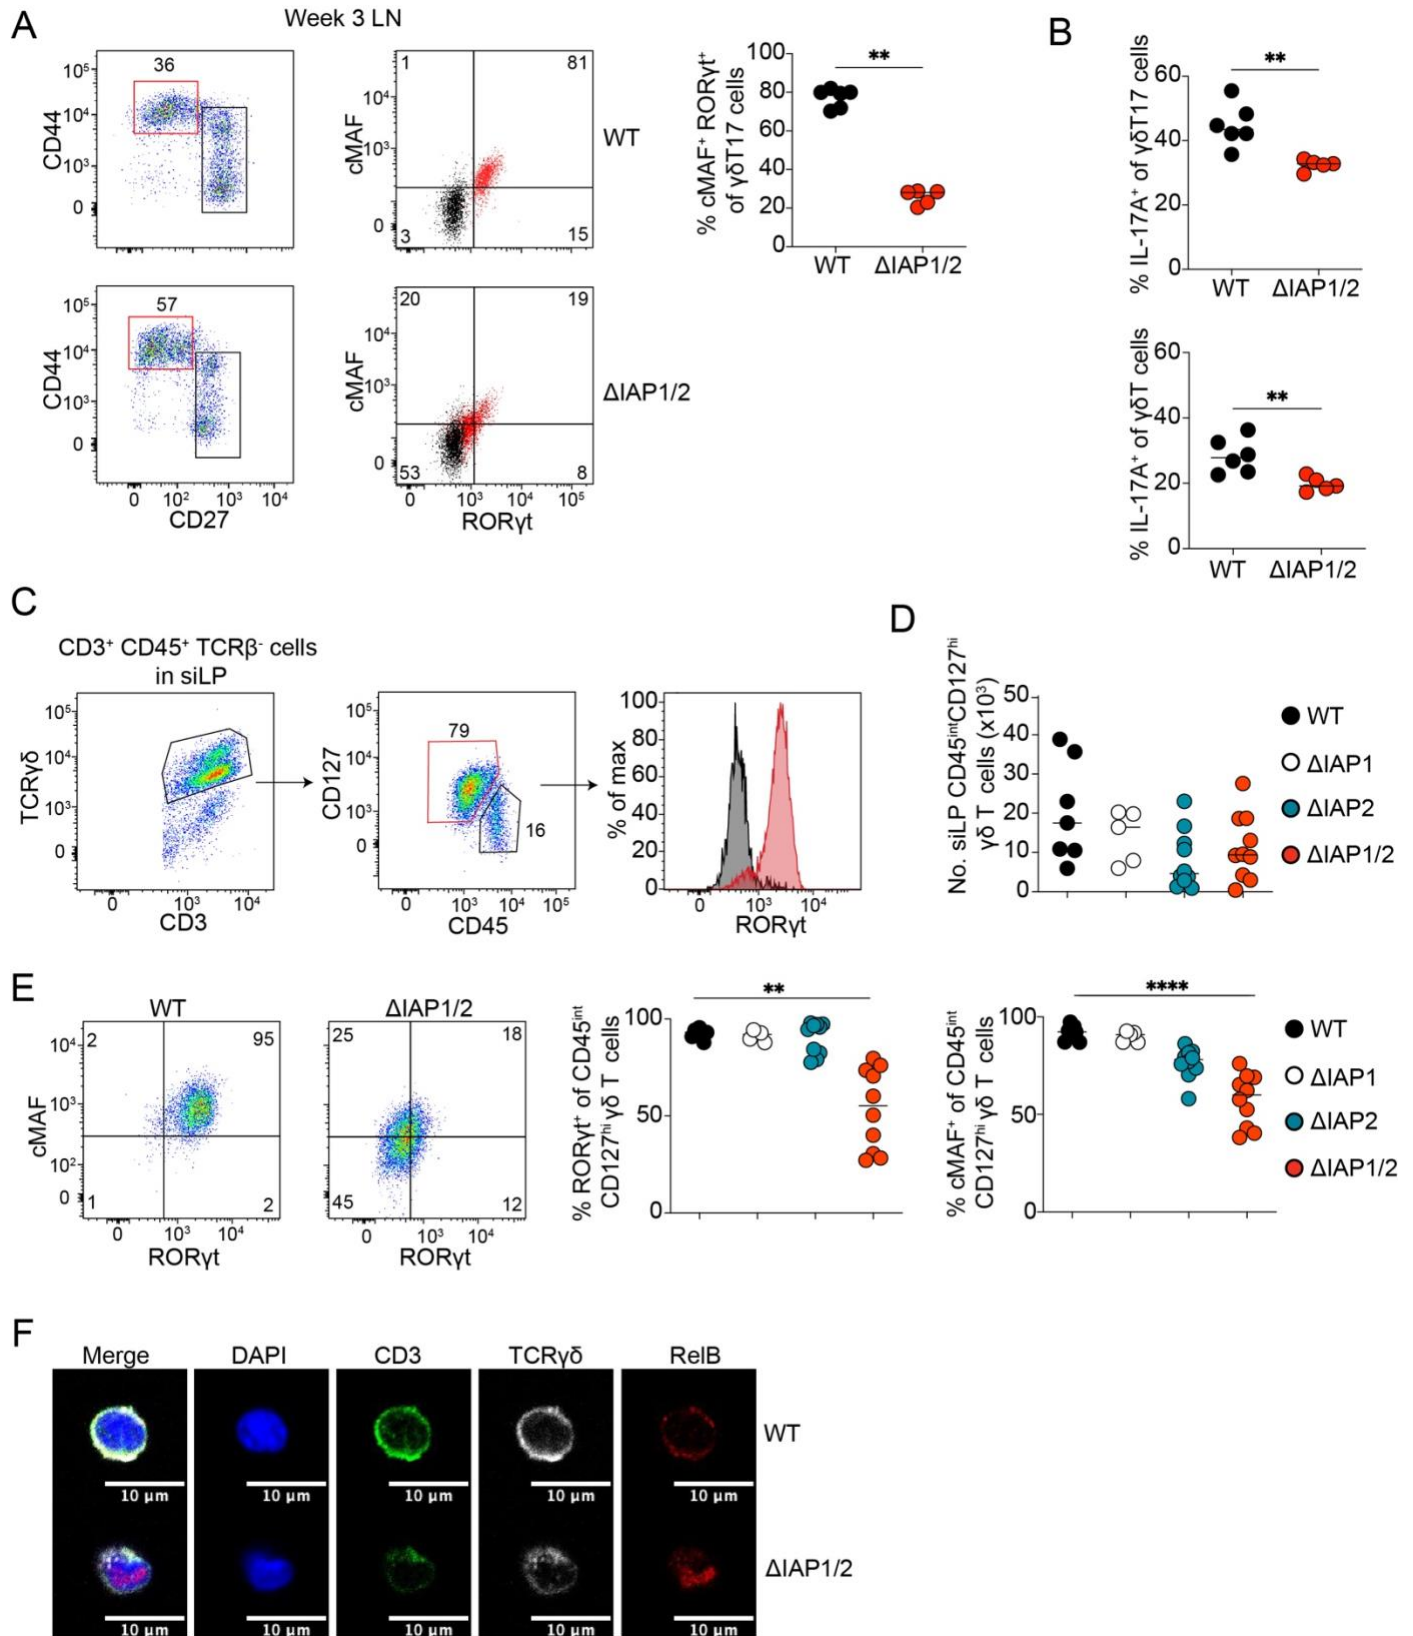

841

842 **Figure 5. cIAP1 and 2 maintain the transcription factor landscape of  $\gamma\delta$ T17 cells in**  
843 **the lymph nodes and intestinal lamina propria.**

844 (A) Flow cytometric analysis (dot plots) and frequency (graphs) of ROR $\gamma$ t<sup>+</sup> cMAF<sup>+</sup> cells  
845 within  $\gamma\delta$ T17 cells from the LNs of 3-week-old WT and  $\Delta$ IAP1/2 mice. (B) frequency of  
846 IL-17<sup>+</sup> cells within  $\gamma\delta$ T17 cells (top) or within all  $\gamma\delta$  T cells (bottom) from the LNs of 3-  
847 week-old WT and  $\Delta$ IAP1/2 mice. In graphs, each symbol represents a mouse, and the  
848 line represent the mean, data is pool of 2 experiments. \*\*P < 0.01 using Mann-Whitney  
849 test. (C) Flow cytometric analysis showing the gating strategy and expression of ROR $\gamma$ t  
850 by CD45<sup>int</sup> CD127<sup>+</sup>  $\gamma\delta$  T cells in siLP of adult WT mice. (D) Numbers of CD45<sup>int</sup> CD127<sup>+</sup>  
851  $\gamma\delta$  T cells in the siLP of 4-week-old WT,  $\Delta$ IAP1,  $\Delta$ IAP2 and  $\Delta$ IAP1/2 mice. (E) Flow  
852 cytometric analysis (dot plots) and quantification (graphs) of ROR $\gamma$ t or cMAF expression  
853 by CD45<sup>int</sup> CD127<sup>+</sup>  $\gamma\delta$  T cells in the siLP of 4-week-old WT,  $\Delta$ IAP1,  $\Delta$ IAP2 and  $\Delta$ IAP1/2  
854 mice. In graphs, each symbol represents a mouse, and the line represent the mean,  
855 data is pool of 4 experiments. \*\*P < 0.01, \*\*\*\*P < 0.001 using using Kruskal-Wallis test  
856 with Dunn's correction. (F) Representative immunofluorescent microscopy analysis of  
857  $\gamma\delta$ T17 cells (CD27<sup>-</sup> TCR $\gamma\delta$ <sup>+</sup> cells) sorted from the LNs of 4-week-old WT or  $\Delta$ IAP1/2  
858 and stained with the indicated antibodies. Images are representative of two independent  
859 experiments.

860 **Figure 6**

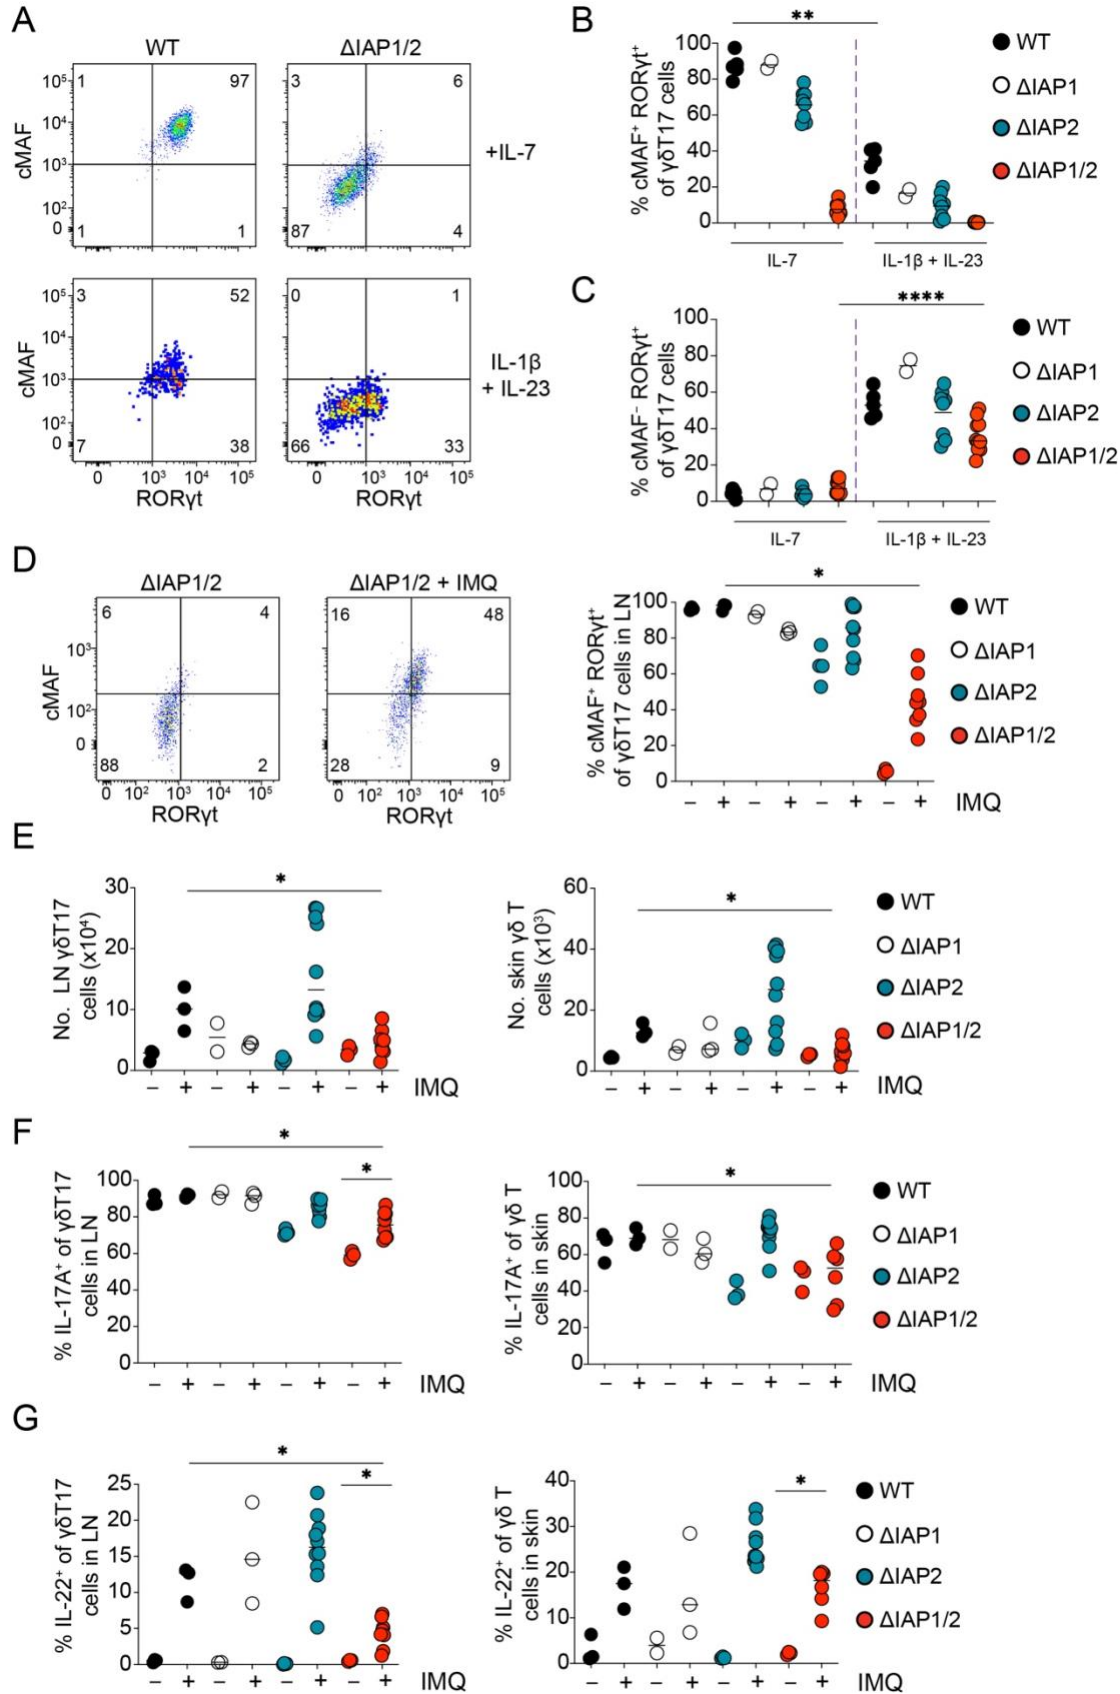

861

862 **Figure 6. Inflammation partially overcomes cIAP1 and cIAP2 deficiency in  $\gamma\delta$ T17**  
863 **cells.**

864 (A) Representative flow cytometric analysis and (B-C) quantification of ROR $\gamma$ t and  
865 cMAF expression by  $\gamma\delta$ T17 cells from the LNs of 4-week-old WT or  $\Delta$ IAP1/2 mice  
866 following ex-vivo culture with the indicated cytokines for 48 hours. In graphs, each  
867 symbol represents a mouse, and the line represent the mean, data is pool of 3  
868 experiments. (D) Representative flow cytometric analysis (dot plot) and quantification  
869 (graph) of ROR $\gamma$ t and cMAF expression by  $\gamma\delta$ T17 in LNs of 4-week-old control or IMQ-  
870 treated  $\Delta$ IAP1/2 mice. (E) Numbers of  $\gamma\delta$ T17 cells in the LNs (right) or skin (left) of 4-  
871 week-old control or IMQ-treated WT,  $\Delta$ IAP1,  $\Delta$ IAP2 or  $\Delta$ IAP1/2 mice. (F-G) Frequency  
872 of IL-17A<sup>+</sup> (F) or IL-22<sup>+</sup> (G) cells within  $\gamma\delta$ T17 cells in the LNs or skin of 4-week-old  
873 control or IMQ-treated WT,  $\Delta$ IAP1,  $\Delta$ IAP2 or  $\Delta$ IAP1/2 mice. In graphs, each symbol  
874 represents a mouse, and the line represent the median, data is pool of 3 experiments.  
875 \*P < 0.05, \*\*P < 0.01, \*\*\*\*P < 0.0001 using Mann-Whitney test.

876

877 **Figure 7**

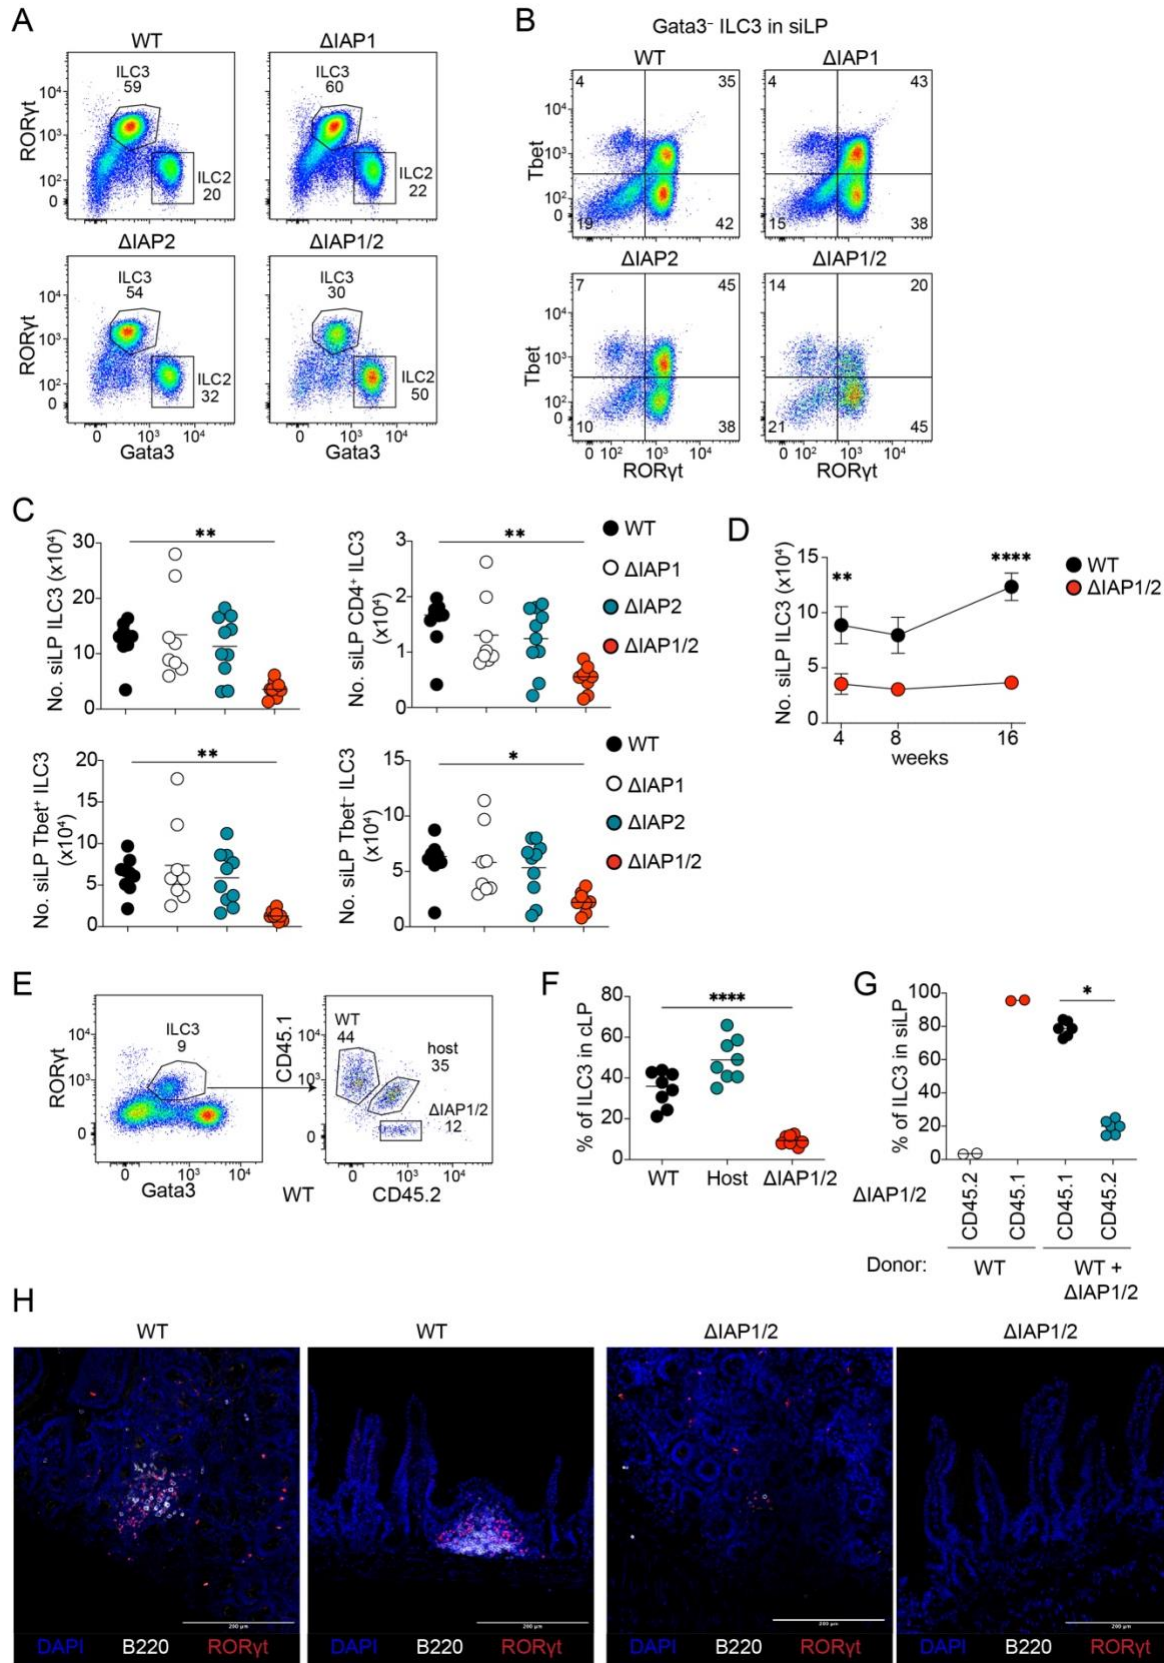

878

879 **Figure 7. cIAP1 and cIAP2 are intrinsically required for the maintenance of**  
880 **intestinal ILC3 and for ILF integrity**

881 Representative flow cytometric analysis of (A) total CD45<sup>+</sup> CD3<sup>-</sup> CD19<sup>-</sup> CD127<sup>+</sup> ILCs or  
882 (B) CD45<sup>+</sup> CD3<sup>-</sup> CD19<sup>-</sup> CD127<sup>+</sup> GATA3<sup>-</sup> cells in the siLP of adult WT,  $\Delta$ IAP1,  $\Delta$ IAP2 or  
883  $\Delta$ IAP1/2 mice. (C) Numbers of total ILC3s, CD4<sup>+</sup>, Tbet<sup>+</sup> or Tbet<sup>-</sup> ILC3s in the siLP of  
884 adult WT,  $\Delta$ IAP1,  $\Delta$ IAP2 or  $\Delta$ IAP1/2 mice. In graphs, each symbol represents a mouse,  
885 and the line represent the mean, data is pool of 5 experiments. \*P < 0.05, \*\*P < 0.01  
886 using Kruskal-Wallis test with Dunn's correction. (D) Numbers of ILC3s in the siLP of  
887 WT and  $\Delta$ IAP1/2 at the indicated timepoints. Each symbol represents the mean  
888 amalgamated data from each timepoint and the error bars represents the SEM. \*\*P <  
889 0.01, \*\*\*\*P < 0.0001 using Two-way ANOVA with Holm-Sidak correction.  
890 (E) representative flow cytometric analysis (dot plots) and (F) frequency (graph) of WT  
891 (CD45.1<sup>+</sup>), host (CD45.1<sup>+</sup> CD45.2<sup>+</sup>) or  $\Delta$ IAP1/2 (CD45.2<sup>+</sup>)- derived ILC3 in the cLP of  
892 reconstituted hosts. In the graph, each symbol represents a mouse, and lines represent  
893 the mean, data is pool of 3 experiments. \*\*\*P < 0.01 using one-way ANOVA with  
894 Tukey's correction. (G) Frequency of WT (CD45.1<sup>+</sup>) or  $\Delta$ IAP1/2(CD45.2<sup>+</sup>)- derived ILC3  
895 in the siLP of bone marrow reconstituted  $\Delta$ IAP1/2 hosts. In graph, each symbol  
896 represents a mouse, and lines represent the mean, data is pool of 2 experiments. \*P <  
897 0.05 using Wilcoxon-rank t-test. (H) representative immunofluorescent microscopy  
898 images showing ILF structures in distal ileum sections from adult WT or  $\Delta$ IAP1/2 mice.  
899 Images are representative of two independent experiments.

900 **Figure 8**

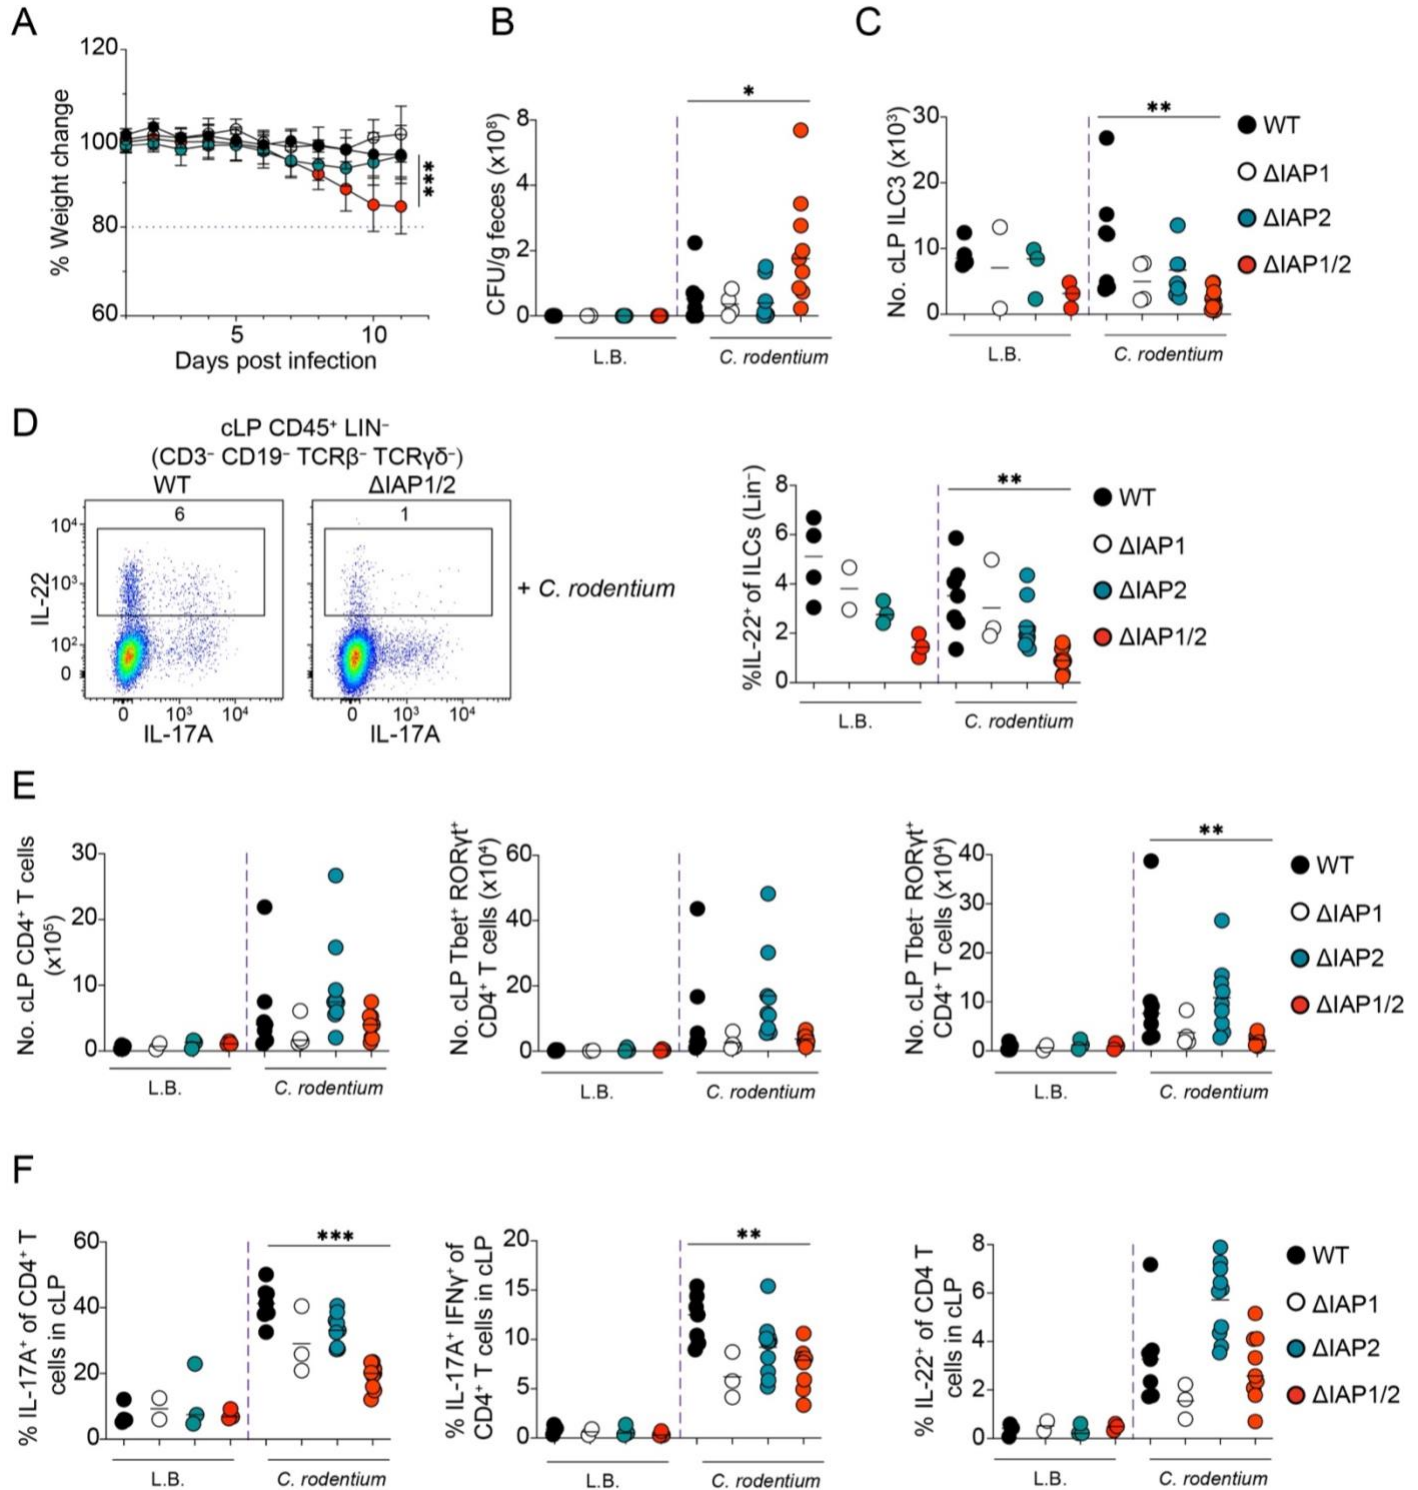

901  
902 **Figure 8. ROR $\gamma$ t<sup>Cre+</sup> cIAP1<sup>F/F</sup> cIAP2<sup>-/-</sup> succumb to *Citrobacter rodentium* infections.**

903 (A) Percentage body weight change of *C. rodentium* infected WT,  $\Delta$ IAP1,  $\Delta$ IAP2 and  
904  $\Delta$ IAP1/2 mice. Each symbol represents the mean amalgamated data from each

905 timepoint and the error bars represents the SD. \*\*\*P < 0.001 using Two-way ANOVA  
906 with Holm-Sidak correction. (B) Colony forming units (CFU) of *C. rodentium* in fecal  
907 matter of infected and uninfected WT,  $\Delta$ IAP1,  $\Delta$ IAP2 and  $\Delta$ IAP1/2 mice. (C) Numbers of  
908 ILC3s in the cLP of infected and uninfected mice. (D) representative flow cytometric  
909 analysis (dot blots) and frequency of IL-22<sup>+</sup> cells within ILCs in the cLP of *C. rodentium*  
910 infected WT and  $\Delta$ IAP1/2 mice. (E) Numbers of total CD4<sup>+</sup> T cells, Tbet<sup>+</sup> ROR $\gamma$ t<sup>+</sup> CD4<sup>+</sup>  
911 T cells, and ROR $\gamma$ t<sup>+</sup> Tbet<sup>-</sup> CD4<sup>+</sup> T cells in the cLP of infected and uninfected mice. (F)  
912 Frequency of IL-17A<sup>+</sup>, IL-17A<sup>+</sup> IFN $\gamma$ <sup>+</sup> or IL-22<sup>+</sup> cells within CD4<sup>+</sup> T cells in the cLP of  
913 infected and uninfected mice. In graphs, each symbol represents a mouse, and lines  
914 represent the median, data is pool of 3 experiments. \*P < 0.05, \*\*P < 0.01, \*\*\*P < 0.001  
915 using Mann-Whitney test.
